# Supplementary material
Source: PubMed Central journal article supplement (PMC3111956)
Supplement: NIHMS185442-supplement-01.pdf [file NIHMS185442-supplement-01.pdf]

# **Studies directed toward the synthesis of the massileunicellins. 2.**

Yonghai Chai, Zonghong Mou and Matthias C. McIntosh

Dept. of Chemistry and Biochemistry, University of Arkansas, Fayetteville, AR 72701, USA

## **Supplementary data**

|                                                   |       |
|---------------------------------------------------|-------|
| Experimental procedures and characterization data | S2-S5 |
| <sup>1</sup> H- and <sup>13</sup> C-NMR spectra   | S6-22 |

Our previous report (ref 7, main text) was published prior to *Tetrahedron Letters*' providing supplementary data online. The experimental procedures and data for compounds **S1**, **S2** and **3** are therefore provided below.

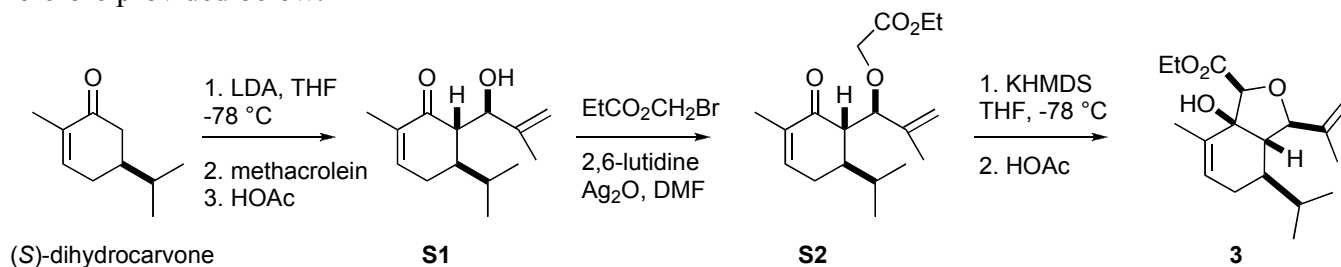

**Hydroxyketone S1.** To a solution of diisopropylamine (8.77 g, 86.7 mmol) in THF (100 mL) was added dropwise n-BuLi (30.2 mL, 2.87 M in hexane, 86.7 mmol) at  $-78\text{ }^{\circ}\text{C}$ . After 15 min, (*S*)-dihydrocarvone (9.63 g, 62.0 mmol) was added dropwise. The mixture was allowed to stir for 15 min, after which methacrolein (8.1 g, 115.6 mmol) was added dropwise. After 4 h at  $-78\text{ }^{\circ}\text{C}$ , AcOH (5.21 g, 86.7 mmol) was added. After 20 min, the reaction mixture was allowed to warm to rt, then was diluted with ether (200 mL) and washed with water (150 mL). The aqueous layer was extracted with ether (3 x 100 mL) and the combined organic layers were washed with brine (150 mL) and dried over anhydrous  $\text{MgSO}_4$ . The organic solvent was removed in vacuo. Purification of the residue by flash chromatography over silica gel (1/10 v/v, EtOAc/hexanes) afforded hydroxyketone **S1** as a colorless oil (13.1 g, 95%).

IR (film) 3454, 1662  $\text{cm}^{-1}$ .  $^1\text{H-NMR}$  (270 MHz,  $\text{CDCl}_3 + \text{D}_2\text{O}$ )  $\delta$  6.61 (m, 1H), 4.98 (m, 1H), 4.93 (m, 1H), 4.22 (d,  $J=9.5$  Hz, 1H), 2.53 (dd,  $J=2.7, 9.4$  Hz + m, 3H), 2.26-2.52 (app dsept,  $J=20.4, 2.8$  Hz, 1H), 2.16-2.23 (app dd,  $J=19.9, 5.54$  Hz, 1H), 1.76 (s, 3H), 1.75 (s, 3H), 1.55-1.65 (m, 2H), 0.85 (m, 6H).  $^{13}\text{C-NMR}$  (67 MHz,  $\text{CDCl}_3$ )  $\delta$  202.03, 145.14, 143.76, 134.85, 114.45, 75.83, 52.91, 42.24, 29.38, 25.42, 20.80, 15.98, 15.87. Anal Calcd for  $\text{C}_{14}\text{H}_{22}\text{O}_2$ : C, 75.63; H, 9.97. Found: C, 75.42; H, 10.03.

**Glycolate S2.** To a solution of alcohol **S1** (9.3 g, 41.0 mmol) in anhydrous DMF (26 mL) was added  $\text{Ag}_2\text{O}$  (38.5 g, 166.0 mmol), ethyl bromoacetate (27.9 g, 166.0 mmol) and 2,6-lutidine (17.8 g, 166.0 mmol). The reaction mixture was allowed to stir at  $4\text{ }^{\circ}\text{C}$  for 7 days, then was filtered through a short silica gel column with ether (200 mL). The filtrate was washed with cold 3N HCl (200 mL). The aqueous layer was extracted with ether (3 x 100 mL) and the combined organic layers were washed with saturated aqueous  $\text{NaHCO}_3$  (200 mL), brine (200 mL) and then dried over anhydrous  $\text{MgSO}_4$ . After removal of solvent in vacuo, the dark brown oil was purified twice via flash chromatography over silica gel (1/7 v/v, EtOAc/hexanes) to afford glycolate **S2** as a pale yellow oil (8.2 g, 65%).

IR (film) 1754, 1683  $\text{cm}^{-1}$ .  $^1\text{H-NMR}$  (270 MHz,  $\text{CDCl}_3$ )  $\delta$  6.4 (m, 1H), 5.1 (s, 1H), 5.0 (s, 1H), 4.17 (d,  $J=10.19$  Hz, 1H), 4.1 (m, 2H), 3.9 (d,  $J=16.63$  Hz, 1H), 3.8 (d,  $J=16.63$  Hz, 1H), 2.7 (dd,  $J=10.19, 1.78$  Hz, 1H), 2.42 (app dsept,  $J=20.0, 2.6$  Hz, 1H), 2.2 (dd,  $J=5.2, 19.90$  Hz, 1H), 1.81 (s, 3H), 1.63 (s, 3H), 1.4-1.6 (m, 2H), 1.20 (t,  $J=7.13$  Hz, 3H), 0.86 (m, 6H).  $^{13}\text{C-NMR}$  (67 MHz,  $\text{CDCl}_3$ )  $\delta$  200.06, 170.15, 141.66, 140.38, 135.07, 117.84, 84.11, 64.33, 60.42, 51.68, 42.67, 29.06, 25.43, 21.37, 20.52, 16.05, 15.73, 14.15. HRMS calcd for  $\text{C}_{18}\text{H}_{29}\text{O}_4$  ( $\text{MH}^+$ ), 308.1988, found 309.2082.

**Isobenzofuran 3.** KHMDS (58.2 mL, 0.5 M in toluene, 29.1 mmol) was added over 5 min to a solution of glycolate **S2** (7.8 g, 25.5 mmol) in THF (100 mL) at -78 °C. After addition of KHMDS, AcOH (1.84 g, 30.7 mmol) was added at -78 °C immediately in one portion. After 10 min at -78 °C, the reaction mixture was warmed to rt, diluted with ether (150 mL) and washed with water (100 mL). The aqueous layer was extracted with ether (3 x 80 mL) and the combined organic layers were washed with brine (150 mL) and dried over anhydrous MgSO<sub>4</sub>. The solvent was removed in vacuo. Purification of the residue by flash chromatography over silica gel (1/10 v/v, EtOAc/hexanes) afforded isobenzofuran **3** as a colorless oil (6.2 g, 85%).

IR (film) 3511, 1737 cm<sup>-1</sup>. <sup>1</sup>H-NMR (270 MHz, CDCl<sub>3</sub>) δ 5.56 (m, 1H), 5.19 (s, 1H), 4.94 (s, 1H), 4.15-4.28 (m, 4H), 3.18 (s, 1H), 2.26 (t, J=7.92 Hz, 1H), 1.9 (m, 2H), 1.75-1.9 (m, 4H), 1.7 (s, 3H), 1.3 (m, 1H), 1.21 (t, J=7.1 Hz, 3H), 0.90 (d, J=6.73 Hz, 3H), 0.76 (d, J=6.73 Hz, 3H). <sup>13</sup>C-NMR (67 MHz, CDCl<sub>3</sub>) δ 170.77, 144.63, 133.11, 113.83, 86.17, 83.46, 81.88, 61.42, 51.42, 40.52, 27.22, 23.42, 21.49, 17.97, 17.61, 14.11.

**Epoxyketone 7.** At -78 °C, dry pyridine (21.0 mL, 260 mmol) was added to a suspension of dry silica gel (13.0 g) and CrO<sub>3</sub> (13.0 g, 130 mmol) in anhydrous CH<sub>2</sub>Cl<sub>2</sub> (200 mL). After 15 min, a solution of alcohol **3** (4.78 g, 15.5 mmol) in CH<sub>2</sub>Cl<sub>2</sub> (50 mL) was added at -78 °C. The resultant mixture was allowed to warm to rt. After 4 h, the mixture was filtered through a short silica gel column with ether (200 mL). The filtrate was concentrated in vacuo and the residue purified via flash chromatography over silica gel (1/7 v/v, EtOAc/hexanes) to afford epoxyketone **7** as a white solid, mp 94-96 °C, (4.5 g, 90%).

IR (film) 1749, 1720 cm<sup>-1</sup>. <sup>1</sup>H-NMR (270 MHz, CDCl<sub>3</sub>) δ 5.08 (s, 1H), 5.02 (s, 1H), 4.36 (s, 1H), 4.1-4.3 (m, 3H), 2.64 (d, J=9.5 Hz, 1H), 2.59 (m, 1H), 2.52 (d, J=11.5 Hz, 1H), 2.00 (dd, J=2.5, 13.0 Hz, 1H), 1.92 (s, 3H), 1.67-1.82 (m, 2H), 1.44 (s, 3H), 1.26 (t, J=7.12 Hz, 3H), 0.79 (d, J=6.73 Hz, 3H), 0.75 (d, J=6.73 Hz, 3H). <sup>13</sup>C-NMR (67 MHz, CDCl<sub>3</sub>) δ 207.46, 168.61, 143.34, 117.43, 89.34, 78.81, 74.50, 63.34, 61.56, 45.41, 41.37, 32.52, 28.05, 20.84, 16.07, 15.47, 14.23, 11.45. Anal Calcd for C<sub>18</sub>H<sub>26</sub>O<sub>5</sub> C, 67.06; H, 8.13. Found: C, 66.99; H, 8.07.

**Alcohol 9.** KHMDS (119.5 mL, 0.5 M in toluene, 59.8 mmol) was added dropwise to a solution of epoxyketone **7** (6.43 g, 19.93 mmol) in ether (250 mL) at -78 °C, followed after 15 min by TMSCl (9.59 mL, 79.72 mmol). The reaction mixture was allowed to warm to rt. After 3 h, it was poured into cold saturated aqueous NaHCO<sub>3</sub> solution (300 mL) and extracted with cold hexanes (3 x 150 mL). The combined organic layers were washed with brine (100 mL), dried over anhydrous MgSO<sub>4</sub>, filtered and concentrated in vacuo to afford enol ether **8** as a pale yellow oil (11.0 g, 100%), which was used without further purification.

To a solution of enol ether **8** (11.0 g, 19.93 mmol) and acetone (14.8 mL, 199.3 mmol) in CH<sub>3</sub>CN (290 mL) was added an aqueous Na<sub>2</sub>EDTA solution (199.3 mL, 4 x 10<sup>-4</sup> M) at rt. A mixture of Oxone (16.7 g, 26.63 mmol) and NaHCO<sub>3</sub> (6.0 g, 69.2 mmol) was added to the above mixture in portions over 10 h. The aqueous layer was separated and extracted with CH<sub>2</sub>Cl<sub>2</sub> (3 x 200 mL). The combined extracts were washed with brine (300 mL), dried over anhydrous MgSO<sub>4</sub>, filtered and concentrated in vacuo to yield a pale yellow oil, 11.8 g.

The oil was dissolved in anhydrous THF (100 mL) and TBAF (43 mL, 1 M in THF, 43 mmol) was added slowly into the solution at 0 °C. After 30 min, water (100 mL) was added into the reaction mixture.

The aqueous layer was separated and extracted with CH<sub>2</sub>Cl<sub>2</sub> (3 x 60 mL). The combined organic extracts were washed with brine (100 mL), dried over anhydrous MgSO<sub>4</sub>, filtered and concentrated in vacuo. Purification of the residue via flash chromatography over silica gel (1/6 to 1/3 v/v, EtOAc/hexanes) afforded alcohol **9** as a pale yellow oil (5.6 g, 83%).

IR (film) 3480, 1730, 1676 cm<sup>-1</sup>. <sup>1</sup>H-NMR (270 MHz, CDCl<sub>3</sub>) δ 5.02 (s, 1H), 4.97 (s, 1H), 4.75 (d, J=6.93 Hz, 1H), 4.66 (dd, J=4.75, 10.98 Hz, 1H), 4.2 (m, 2H), 3.3 (m, 2H), 3.16 (s, 1H), 1.95 (m, 1H), 1.79 (s, 3H), 1.68 (t, J=10.98 Hz, 1H), 1.58 (s, 3H), 1.30 (t, J=7.12 Hz, 3H), 1.07 (d, J=6.93 Hz, 3H), 0.97 (d, J=6.93 Hz, 3H). <sup>13</sup>C-NMR (67 MHz, CDCl<sub>3</sub>) δ 208.93, 161.59, 143.29, 142.88, 120.59, 114.75, 88.89, 73.37, 72.42, 62.29, 56.27, 46.13, 27.54, 22.58, 21.67, 16.66, 16.37, 14.04. HRMS: Calcd for C<sub>18</sub>H<sub>26</sub>O<sub>6</sub>Na, 361.1627; found 361.1628.

**Triol 10.** Anhydrous AcOH (58 mL) was added slowly into a suspension of NMe<sub>4</sub>BH(OAc)<sub>3</sub> (22.6 g, 85.5 mmol) in anhydrous CH<sub>3</sub>CN (58 mL). After 40 min, the mixture was cooled to -43 °C and a solution of ketone **9** (3.69 g, 10.88 mmol) in CH<sub>3</sub>CN (58 mL) was added slowly. The reaction mixture was allowed to warm to -20 °C. After 24 h, the mixture was warmed to 0 °C and water (100 mL) was added. A mixture of CH<sub>2</sub>Cl<sub>2</sub> (100 mL) and water (100 mL) was added and the mixture neutralized to pH 7 by addition of NaHCO<sub>3</sub> at 0 °C. The organic layer was separated and the aqueous layer was extracted with CH<sub>2</sub>Cl<sub>2</sub> (3 x 100 mL). The combined extracts were washed with brine (150 mL), dried over anhydrous MgSO<sub>4</sub>, filtered and concentrated in vacuo. Purification of the residue through a short pad of silica gel (1/1, v/v, EtOAc/hexanes) afforded triol **10** as a white foam (3.52 g, 95%).

IR (film) 3435, 1732 cm<sup>-1</sup>. <sup>1</sup>H-NMR (270 MHz, CDCl<sub>3</sub>) δ 5.14 (s, 1H), 5.05 (s, 1H), 4.96 (s, 1H), 4.56 (d, J=11.48 Hz, 1H), 4.28 (m, 2H), 4.05 (s, 1H), 3.95 (t, J=5.34 Hz, 1H), 3.62 (s, 1H), 3.08 (t, J=12.47 Hz, 1H), 3.00 (s, 1H), 1.62-1.89 (m, 5H), 1.49 (s, 3H), 1.29 (t, J=7.12 Hz, 3H), 0.97 (d, J=6.93 Hz, 3H), 0.63 (d, J=6.73 Hz, 3H). <sup>13</sup>C-NMR (67 MHz, CDCl<sub>3</sub>) δ 162.49, 142.10, 140.68, 134.81, 117.14, 91.63, 74.03, 70.50, 67.29, 62.21, 50.74, 43.75, 26.51, 23.34, 21.39, 16.62, 15.95, 14.17.

**Diacetate 11.** Triethylamine (5.8 mL, 40.6 mmol) was added to a solution of triol **10** (2.71 g, 7.97 mmol) and DMAP (101 mg, 0.797 mmol) in anhydrous CH<sub>2</sub>Cl<sub>2</sub> (60 mL), followed by dropwise addition of Ac<sub>2</sub>O (2.27 mL, 23.9 mmol) at -10 °C. The reaction mixture was stirred at -10 °C for 16 h. Water (100 mL) was added and the aqueous layer extracted with CH<sub>2</sub>Cl<sub>2</sub> (3 x 50 mL). The combined extracts were washed with brine (100 mL) and dried over anhydrous MgSO<sub>4</sub>, filtered and concentrated in vacuo. The residue was purified via flash chromatography over silica gel (1/2, v/v, EtOAc/hexanes) to afford diacetate **11** as a white foam (2.71 g, 80%).

IR (film) 3460, 2965, 1742 cm<sup>-1</sup>. <sup>1</sup>H-NMR (270 MHz, CDCl<sub>3</sub>) δ 5.31 (dd, J=4.35, 7.62 Hz, 1H), 5.00 (m, 2H), 4.97 (s, 1H), 4.65 (d, J=9.90 Hz, 1H), 4.25 (m, 2H), 3.18 (dd, J=9.90, 12.27 Hz, 1H), 2.01 (s, 3H), 1.96 (s, 3H), 1.76-1.91 (m, 2H), 1.74 (s, 3H), 1.48 (s, 3H), 1.29 (t, J=7.13 Hz, 3H), 0.84 (d, J=7.13 Hz, 3H), 0.74 (d, J=6.73 Hz, 3H). <sup>13</sup>C-NMR (67 MHz, CDCl<sub>3</sub>) δ 170.20, 169.89, 162.05, 142.57, 141.10, 116.06, 90.50, 74.19, 69.23, 68.18, 62.08, 48.43, 45.17, 26.61, 23.87, 21.33, 21.09, 20.85, 16.51, 15.76, 14.11.

**Ketone 12.** A solution of OsO<sub>4</sub> (0.72 mL, 4 % by wt solution in water) was added dropwise to a mixture of methanesulfonamide (0.34 g, 3.53 mmol), K<sub>2</sub>CO<sub>3</sub> (1.5 g, 10.51 mmol), K<sub>3</sub>Fe(CN)<sub>6</sub> (3.45 g, 10.5 mmol), (DHQD)<sub>2</sub>PHAL (136 mg, 0.176 mmol) and diacetate **11** (1.5 g, 3.53 mmol) in t-BuOH (35 mL) and water (35 mL) at 4 °C. After 3 h at 4 °C, cold saturated Na<sub>2</sub>S<sub>2</sub>O<sub>3</sub> was added. The organic layer was separated and the aqueous layer was extracted with CHCl<sub>3</sub> (3 x 40 mL). The combined organic extracts were washed with brine (50 mL), dried over anhydrous MgSO<sub>4</sub>, filtered and concentrated in vacuo. The residue was purified via flash chromatography over silica gel (3/1, v/v, EtOAc/hexanes) to afford the intermediate triol as a white foam (1.5 g, 95%).

To a solution of the triol (3.9 g, 8.49 mmol) in THF (80 mL) was added NaIO<sub>4</sub> (3.63 g, 16.98 mmol), followed by water (80 mL). The reaction mixture was stirred at rt for 5 h and then filtered. The organic layer was separated and the aqueous layer extracted with CH<sub>2</sub>Cl<sub>2</sub> (3 x 50 mL). The combined organic extracts were washed with brine (80 mL), dried over anhydrous MgSO<sub>4</sub>, filtered and concentrated in vacuo. The residue was purified via flash chromatography through a short silica gel column (1/1, v/v EtOAc/hexanes) to afford ketone **12** as a white foam (3.26 g, 90%).

IR (film) 3474, 1742 cm<sup>-1</sup>. <sup>1</sup>H-NMR (270 MHz, CDCl<sub>3</sub>) δ 5.36 (dd, J=3.56, 9.7 Hz, 1H), 5.27 (s, 1H), 5.06 (d, J=3.56 Hz, 1H), 4.3 (m, 2H), 3.36 (dd, J=7.52, 12.07 Hz, 1H), 2.27 (s, 3H), 2.04 (s, 3H), 1.97 (s, 3H), 1.72-1.83 (m, 2H), 1.40 (s, 3H), 1.28 (t, J=7.12 Hz, 3H), 0.93 (d, J=6.93 Hz, 3H), 0.82 (d, J=6.73 Hz, 1H). <sup>13</sup>C-NMR (67 MHz, CDCl<sub>3</sub>) δ 207.53, 170.17, 170.02, 161.34, 140.67, 75.09, 69.65, 62.07, 47.03, 46.69, 27.20, 25.93, 24.00, 21.90, 21.07, 20.85, 16.07, 14.06.

**Hydroisobenzofuran 13.** Crabtree's catalyst (1.24 g, 1.52 mmol) was added to a solution of ketone **12** (3.3 g, 7.62 mmol) in CH<sub>2</sub>Cl<sub>2</sub> (160 mL). The reaction mixture was shaken under 80 psi of H<sub>2</sub> for 20 h. The mixture was concentrated in vacuo and the residue purified via flash chromatography over silica gel (1/3, v/v, EtOAc/hexanes) to afford isobenzofuran **13** as a white foam (3.3 g, 100%).

IR (film) 3474, 1740 cm<sup>-1</sup>. <sup>1</sup>H-NMR (270 MHz, CDCl<sub>3</sub>) δ 5.37 (dd, J=3.17, 6.14 Hz, 1H), 5.00 (d, J=3.17 Hz, 1H), 4.75 (d, J=6.43 Hz, 1H), 4.58 (d, J=8.11 Hz, 1H), 4.3 (m, 2H), 2.77 (t, J=6.93 Hz, 1H), 2.52 (s, 1H), 2.45 (app q, J=7.52 Hz, 1H), 2.23 (s, 3H), 2.07 (s, 3H), 2.05 (s, 3H), 2.0 (m, 1H), 1.8 (m, 1H), 1.46 (s, 3H), 1.34 (t, J=7.32 Hz, 3H), 0.99 (d, J=6.93 Hz, 3H), 0.96 (t, J=6.93 Hz, 3H). <sup>13</sup>C-NMR (67 MHz, CDCl<sub>3</sub>) δ 209.33, 171.36, 170.49, 169.85, 87.29, 80.26, 74.28, 71.66, 71.02, 61.62, 51.97, 43.33, 41.98, 29.90, 25.89, 22.70, 22.50, 21.25, 21.00, 18.39, 14.22.

ychai-IV-Aldol\_adduct.6

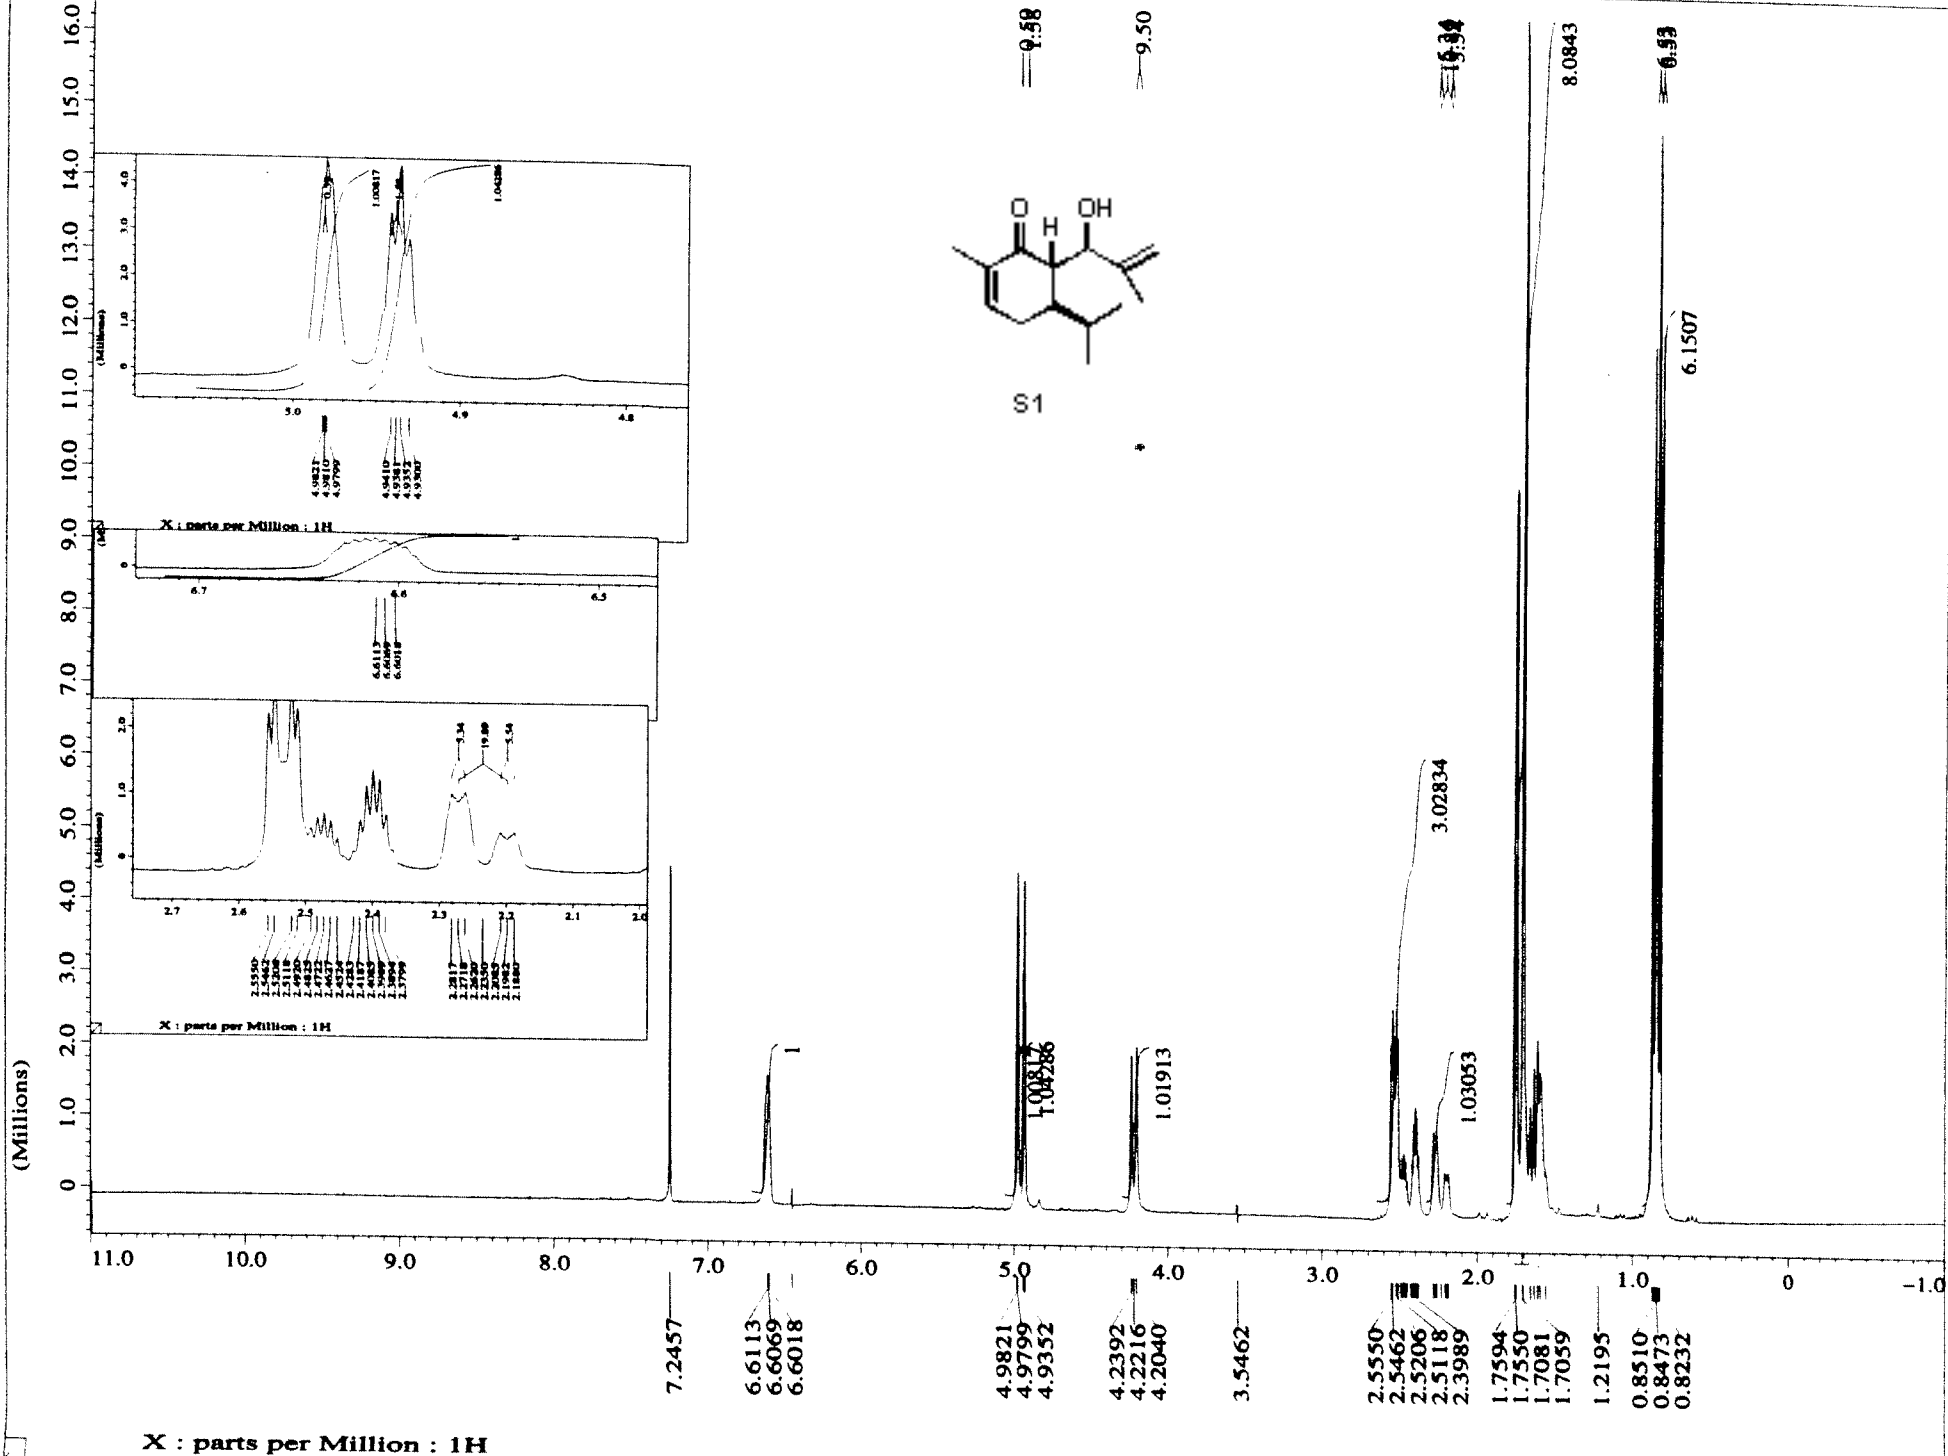

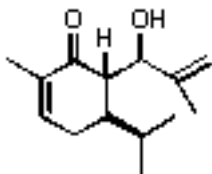

S1

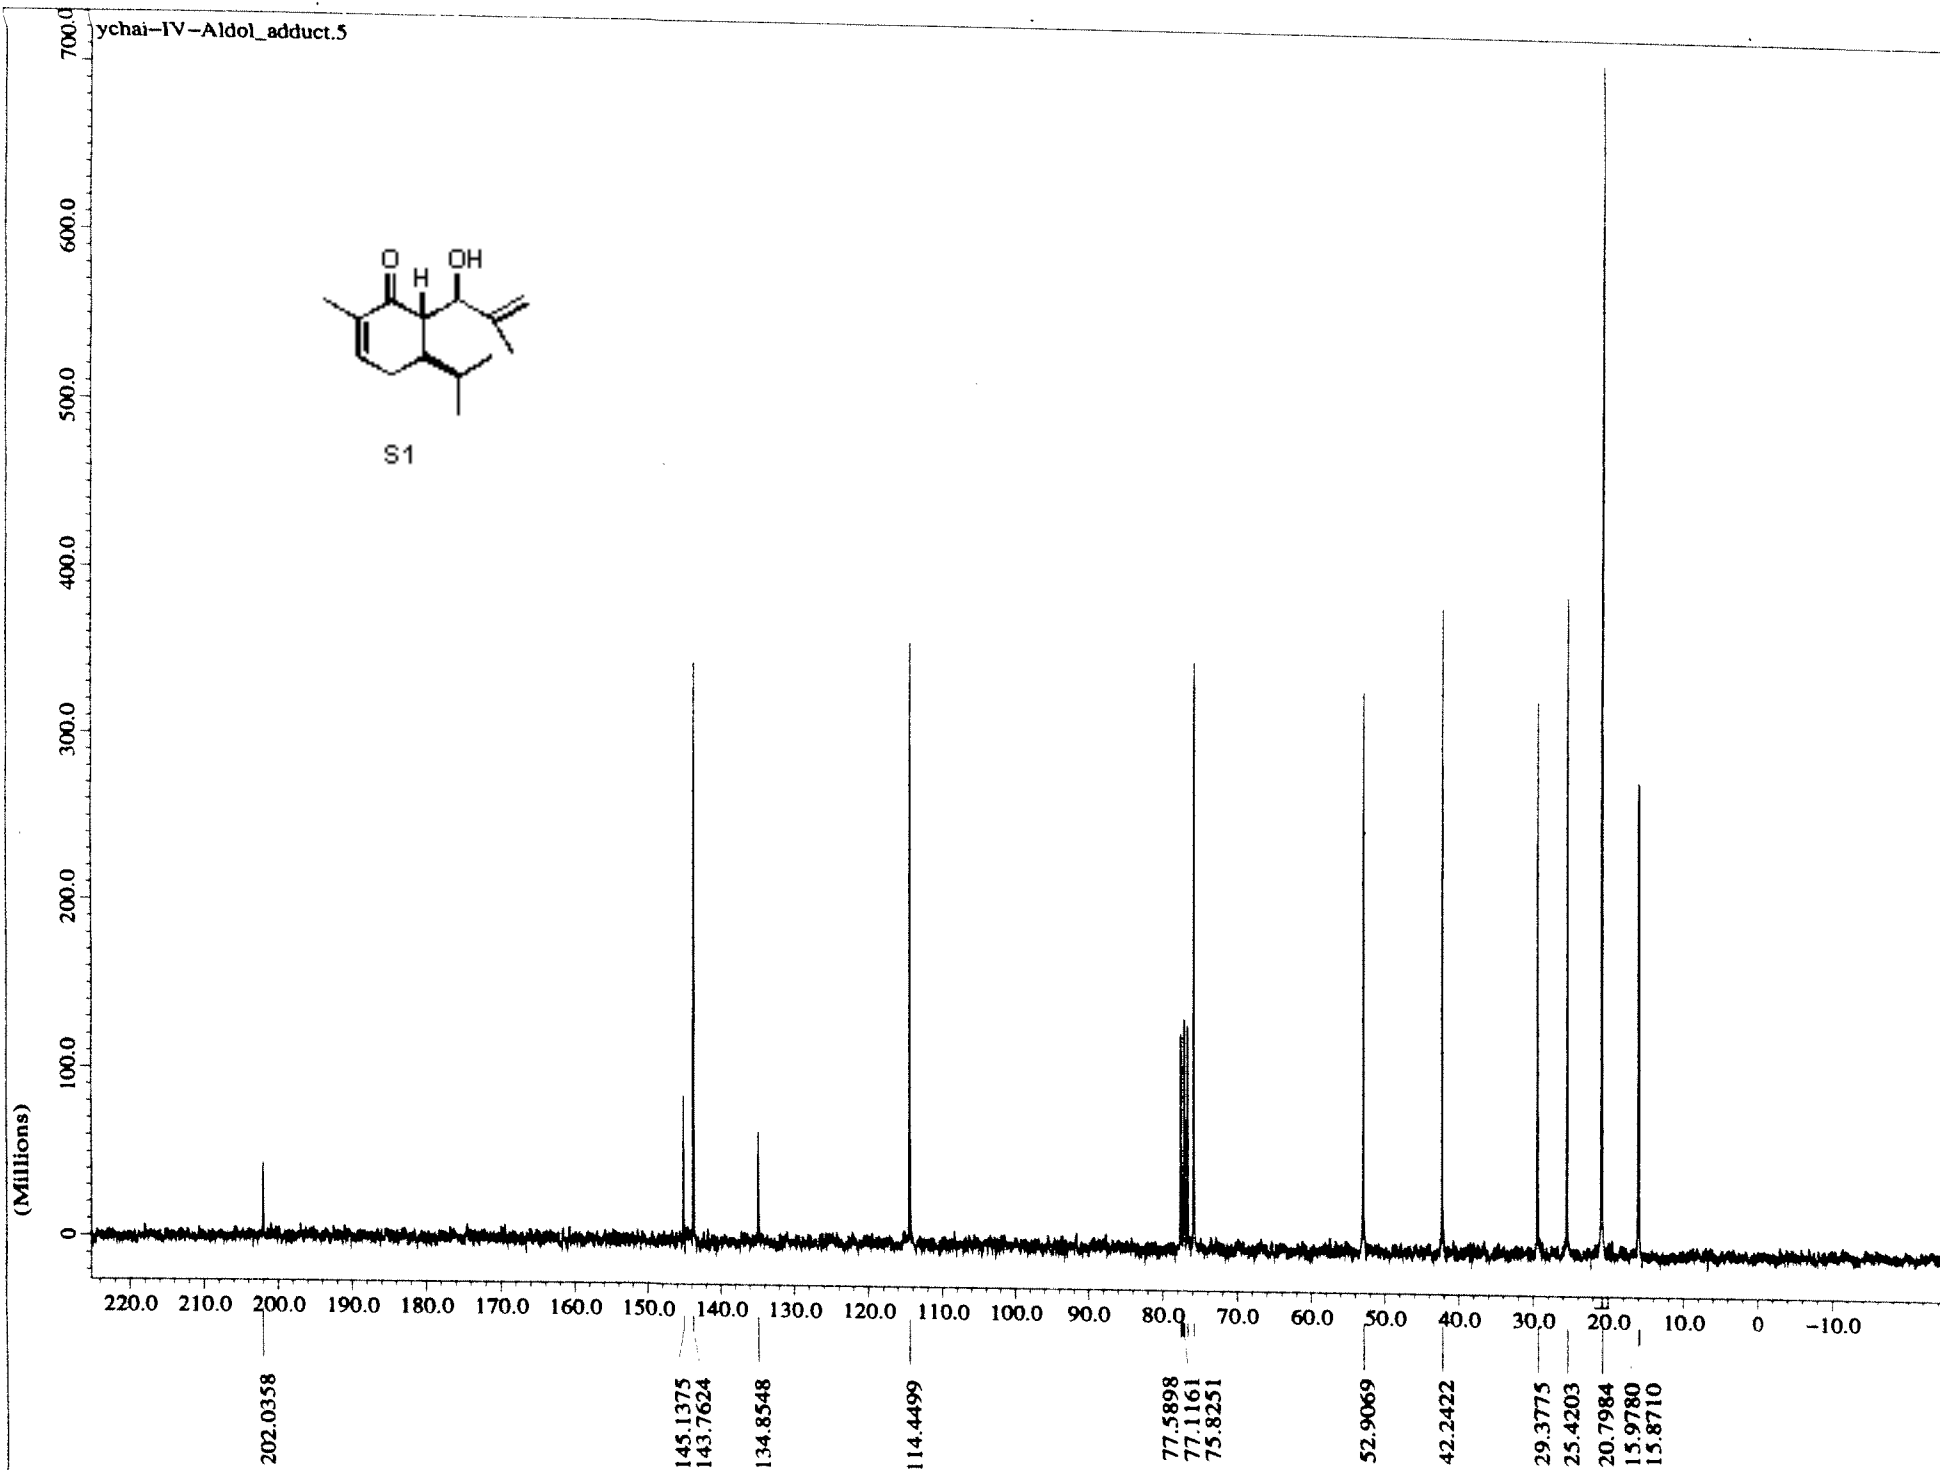

X : parts per Million : 13C

ychai-V-glycolat-2.5

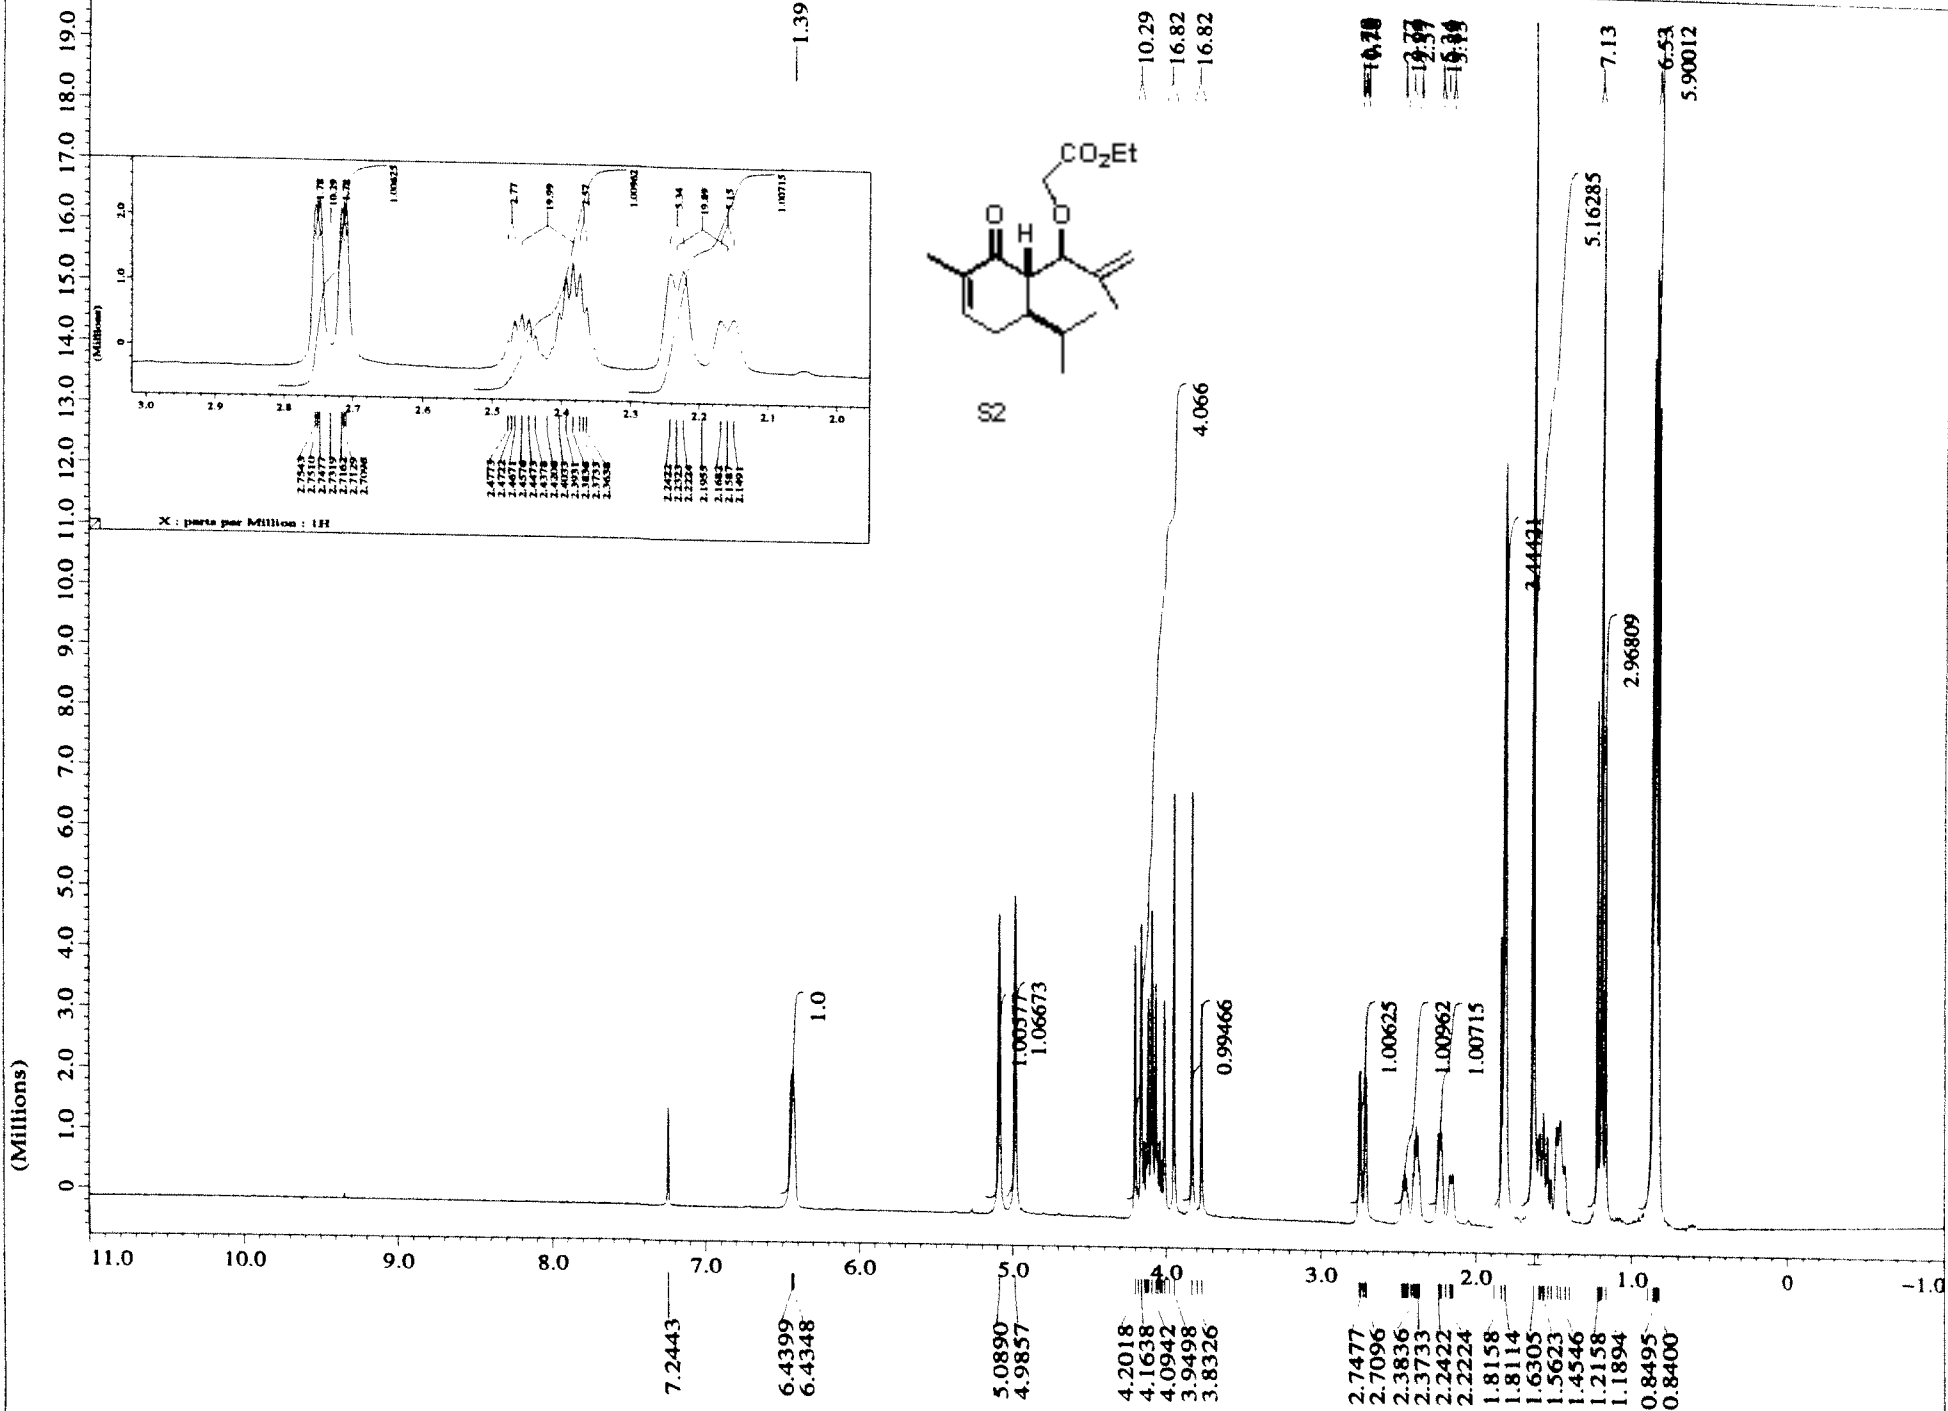

X : parts per Million : 1H



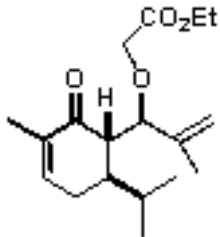

82

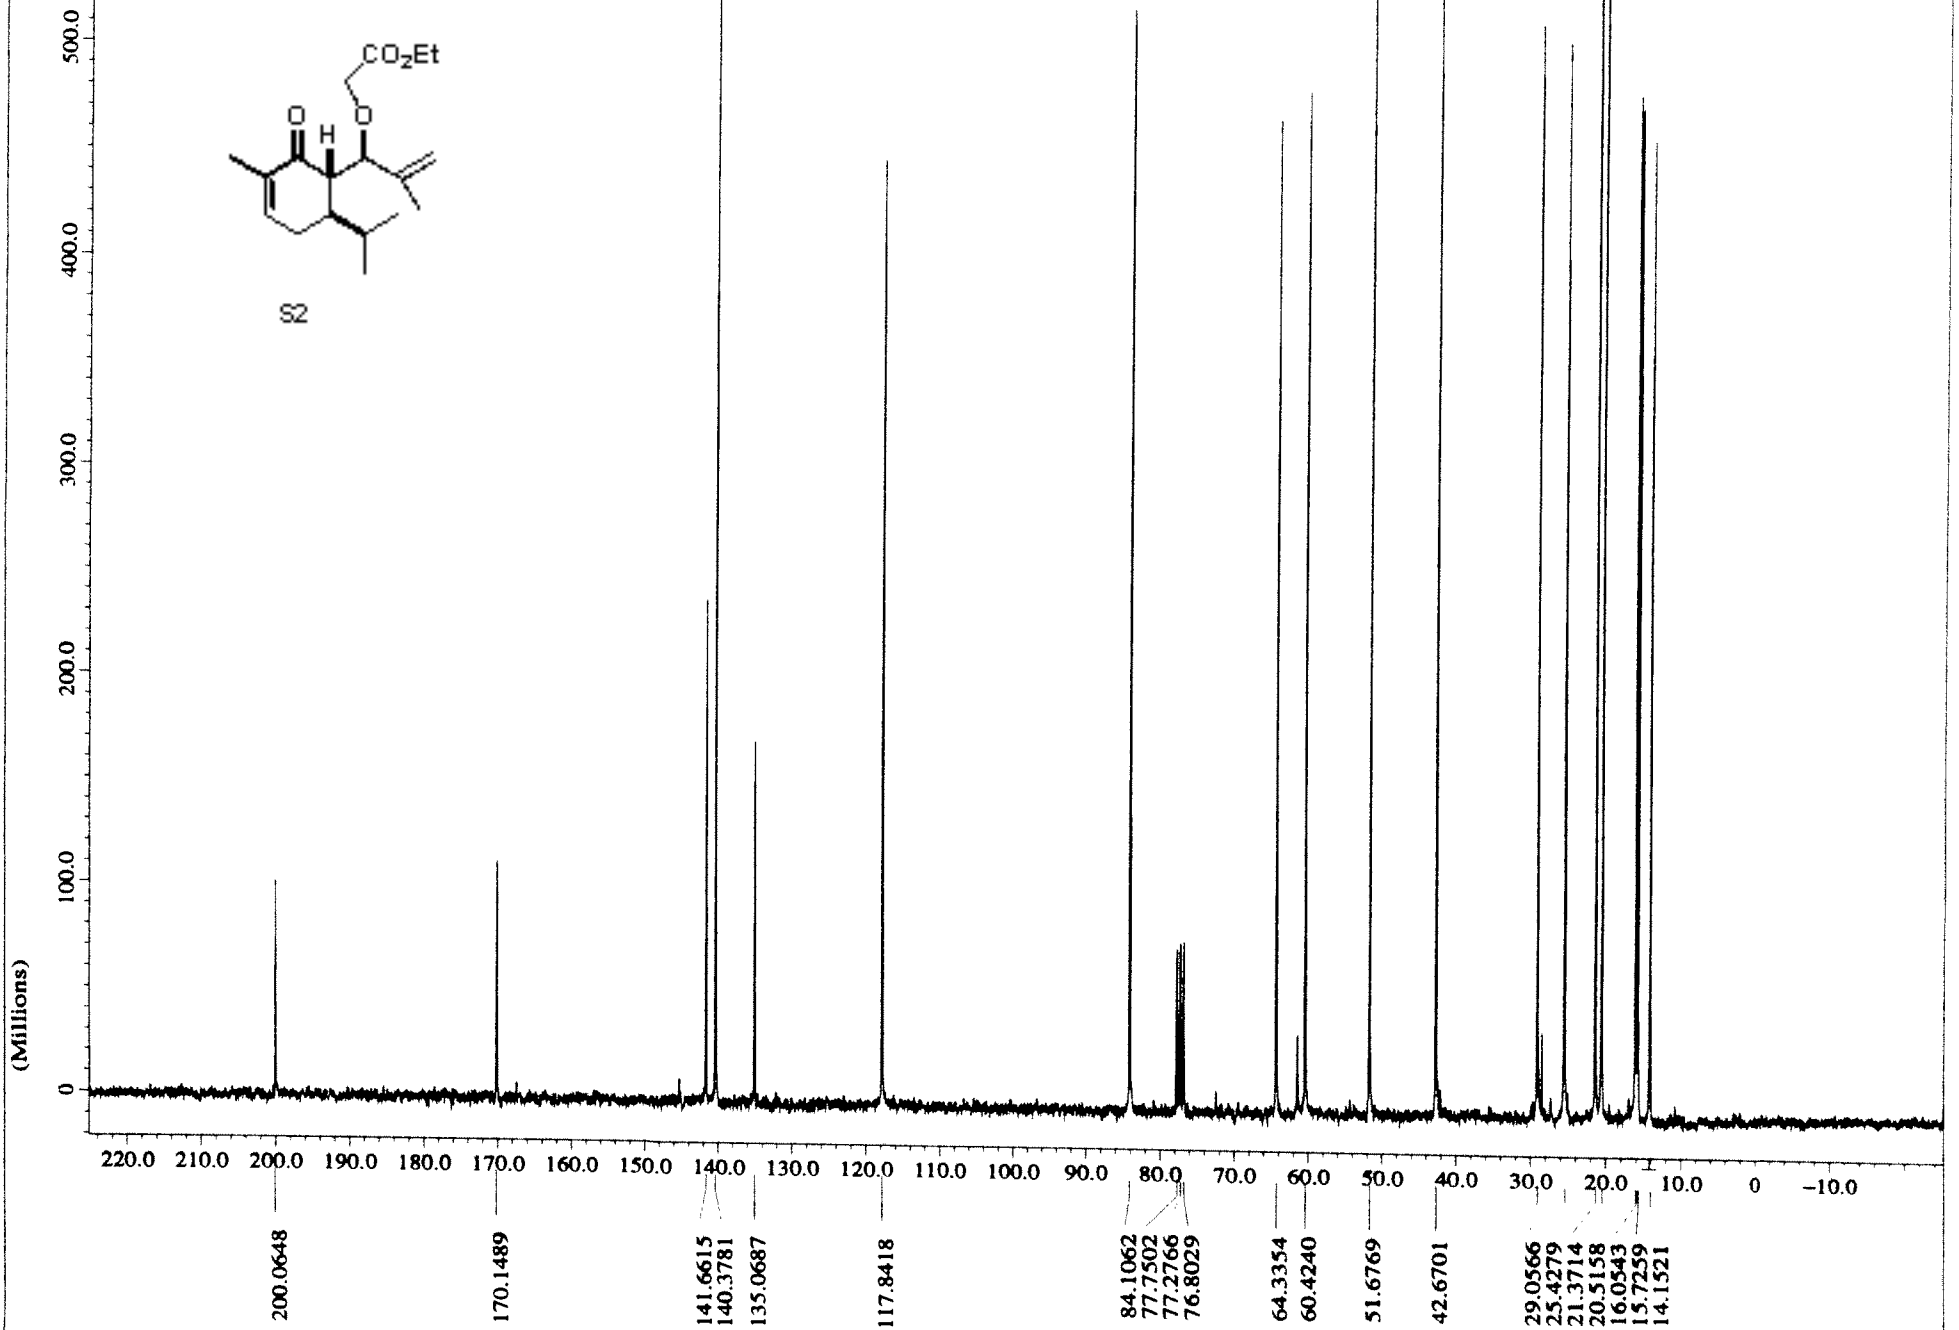

X : parts per Million : 13C



ychai-IV-cycloaldol.4

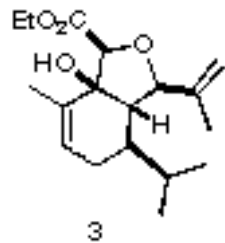

(Millions)

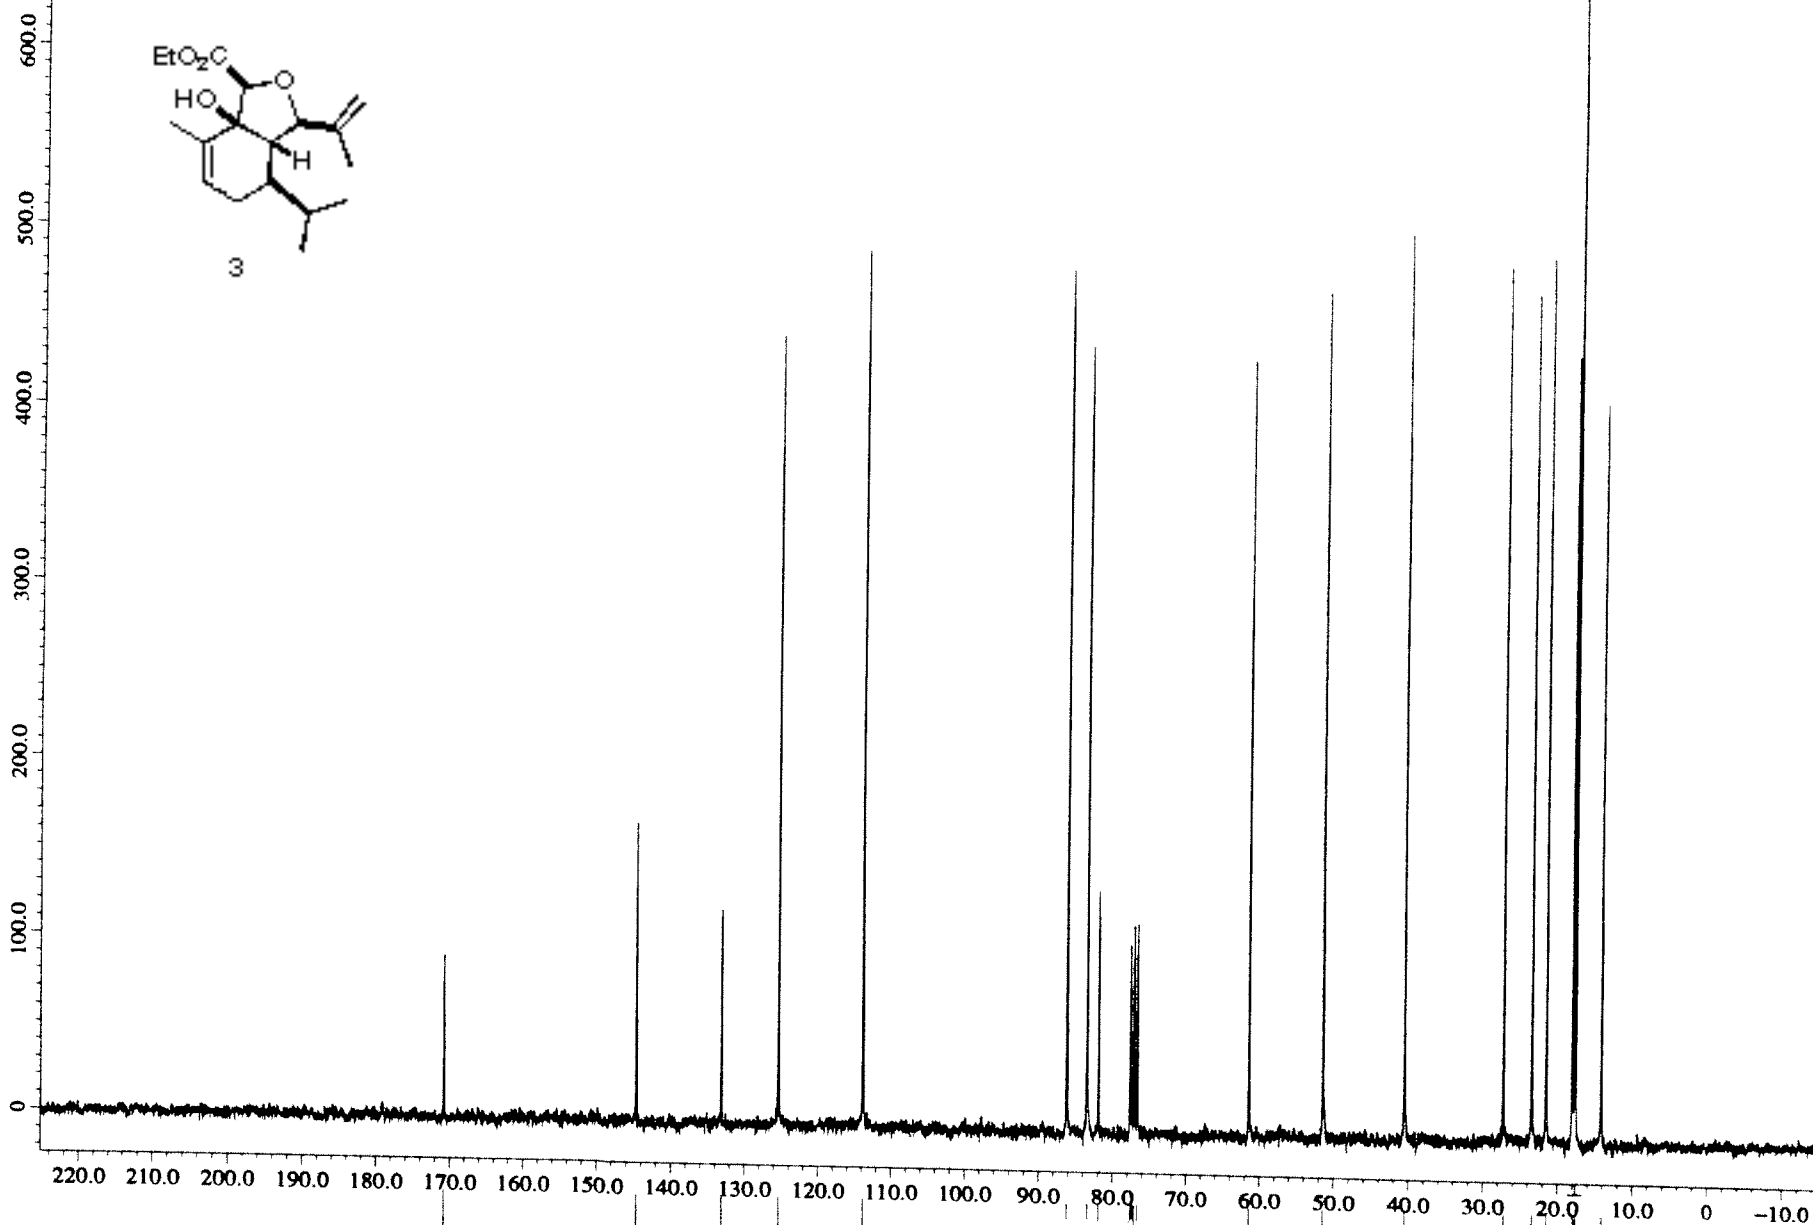

170.7677

144.6256

133.1054

125.3743

113.8312

86.1688

83.4569

81.8831

77.6051

77.1391

76.6654

61.4248

51.4248

40.5234

27.2232

23.4187

21.4860

17.9718

17.6052

14.1139

X : parts per Million : 13C



ychai-V-epoxyketone.8

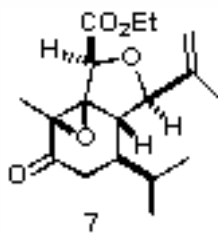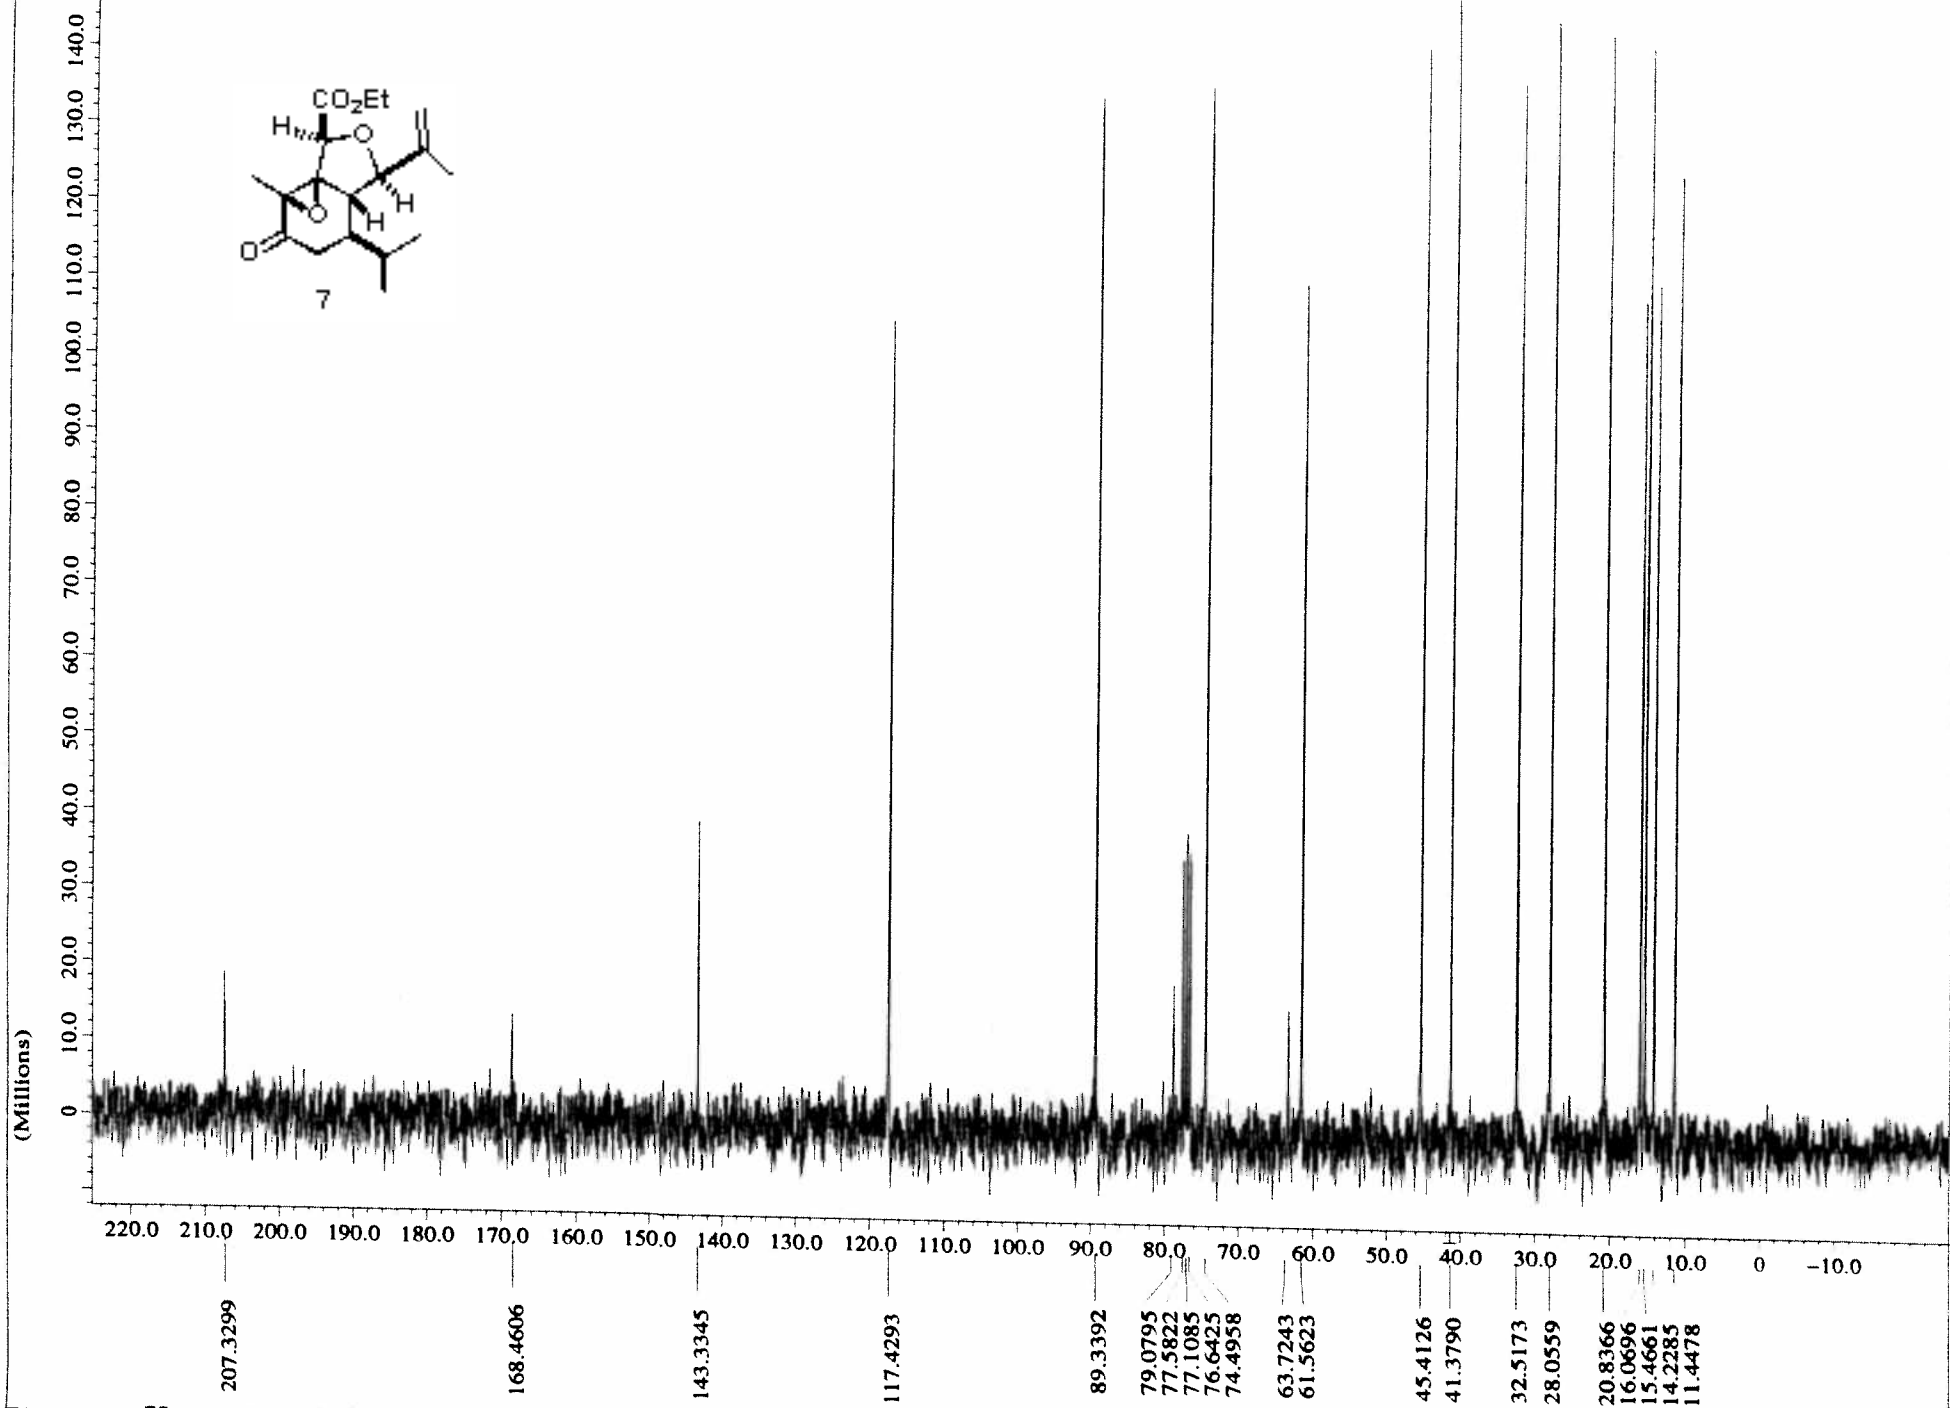

X : parts per Million : 13C



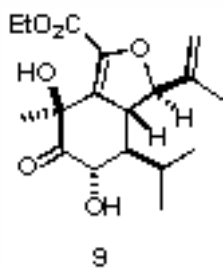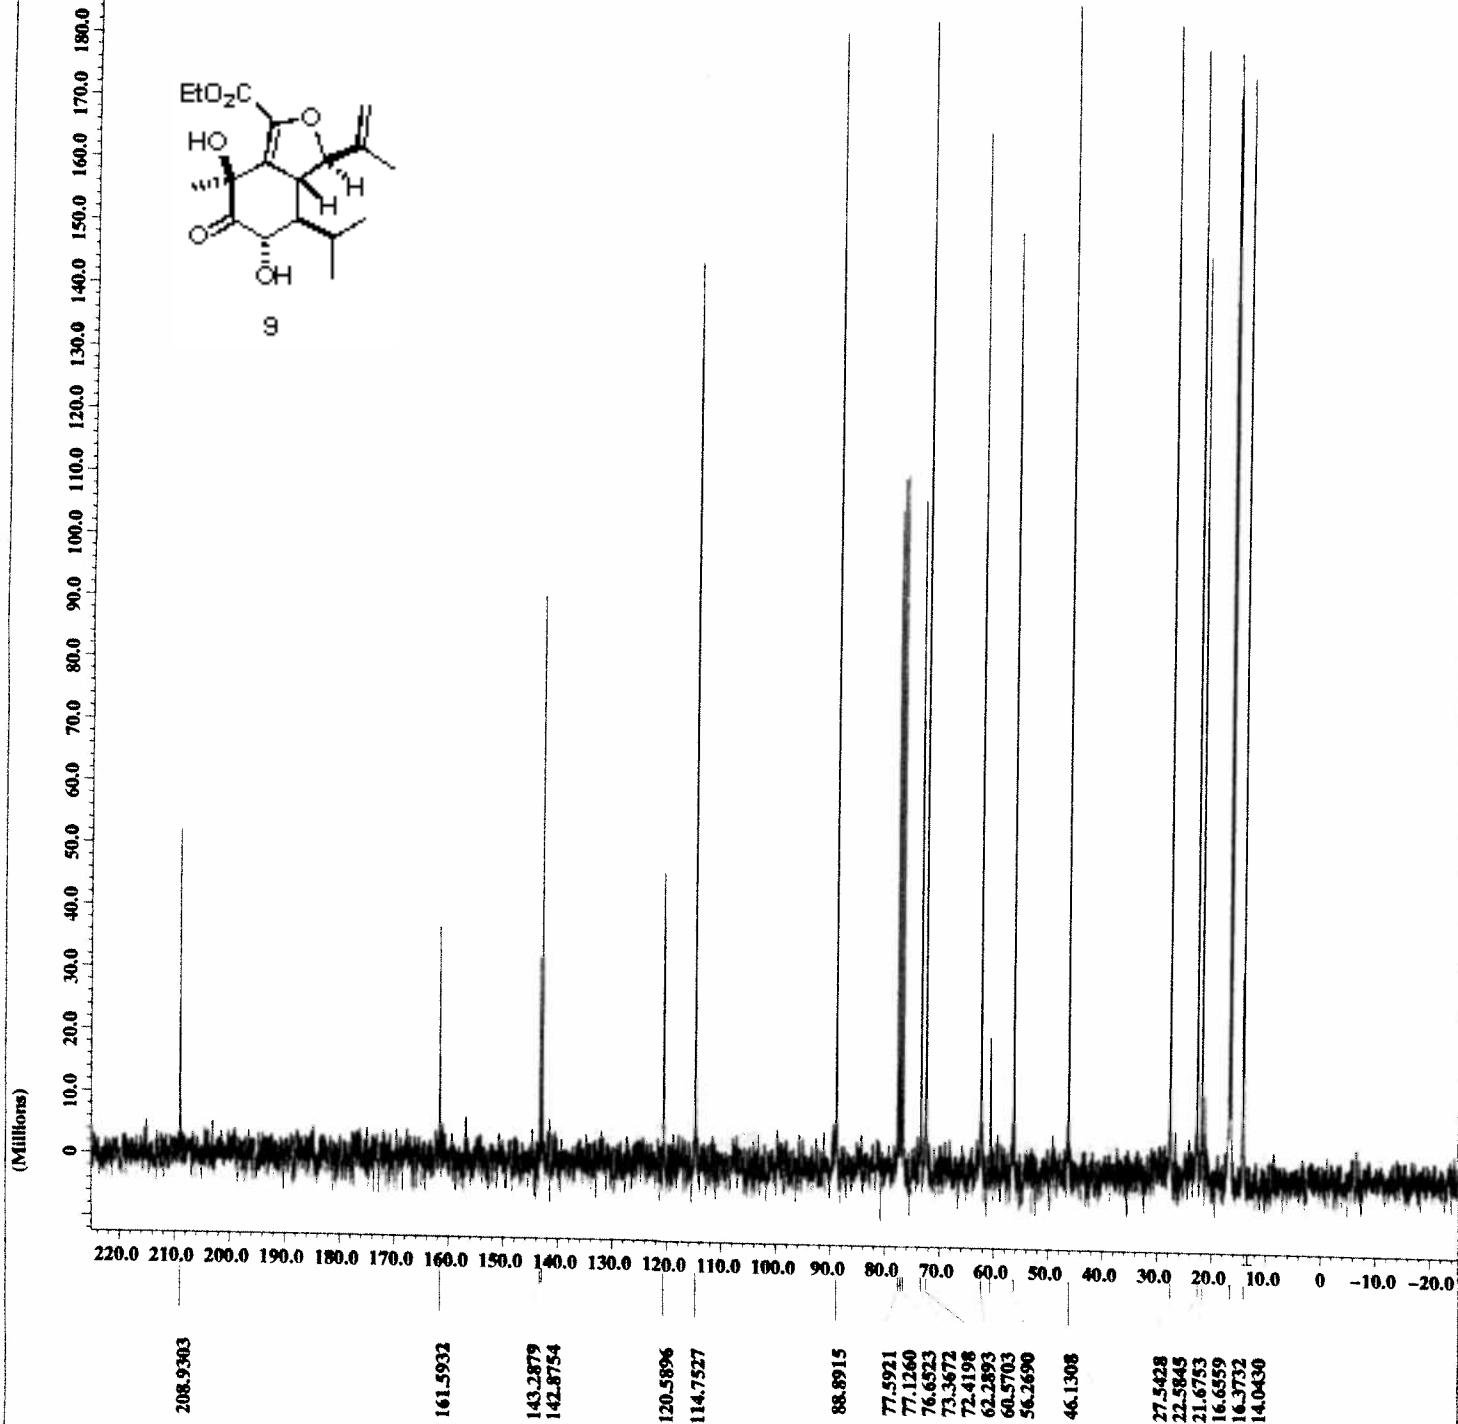

X : parts per Million : 13C

# JEOL

```

---- ACQUISITION PARAMETERS ----
Derived from: ychai-V-diolketone.2
File Name      = ychai-V-diolketone.5
Author        = mcintoshgroup
Sample ID     = 88391583
Content       = Single Pulse with Bro
Creation Date  = 13-DEC-2004 11:54:21

Revision Date  = 13-DEC-2004 11:11:01
Spec Site     = DELTA NMR

Spec Type     = DELTA_NMR
Data Format    = 1D_COMPLEX
Dimensions    = X
Dim Title     = 13C
Dim Size      = 32768
Dim Units     = [ppm]
Field_strength = 6.345446[T] (270[MHz])
X_acq_duration = 1.9267584[s]
X_domain      = 13C
X_freq        = 67.93330993[MHz]
X_offset      = 100[ppm]
X_points      = 32768
X_prescans    = 4
X_resolution  = 0.51900643[Hz]
X_sweep       = 17.00680272[kHz]
Irr_domain    = 1H
Irr_freq      = 270.16608844[MHz]
Irr_offset    = 5[ppm]
Mod_return    = 1
Scans         = 119
Total_scans   = 119

X_90_width    = 8.3[us]
X_acq_time    = 1.9267584[s]
X_angle       = 90[deg]
X_pulse       = 8.3[us]
Initial_wait  = 1[s]
Phase_preset  = 3[us]
Relaxation_delay = 4[s]
Unblank_time  = 2[us]
  
```





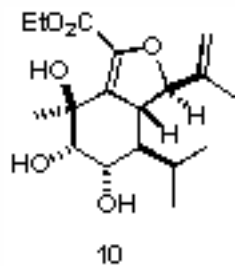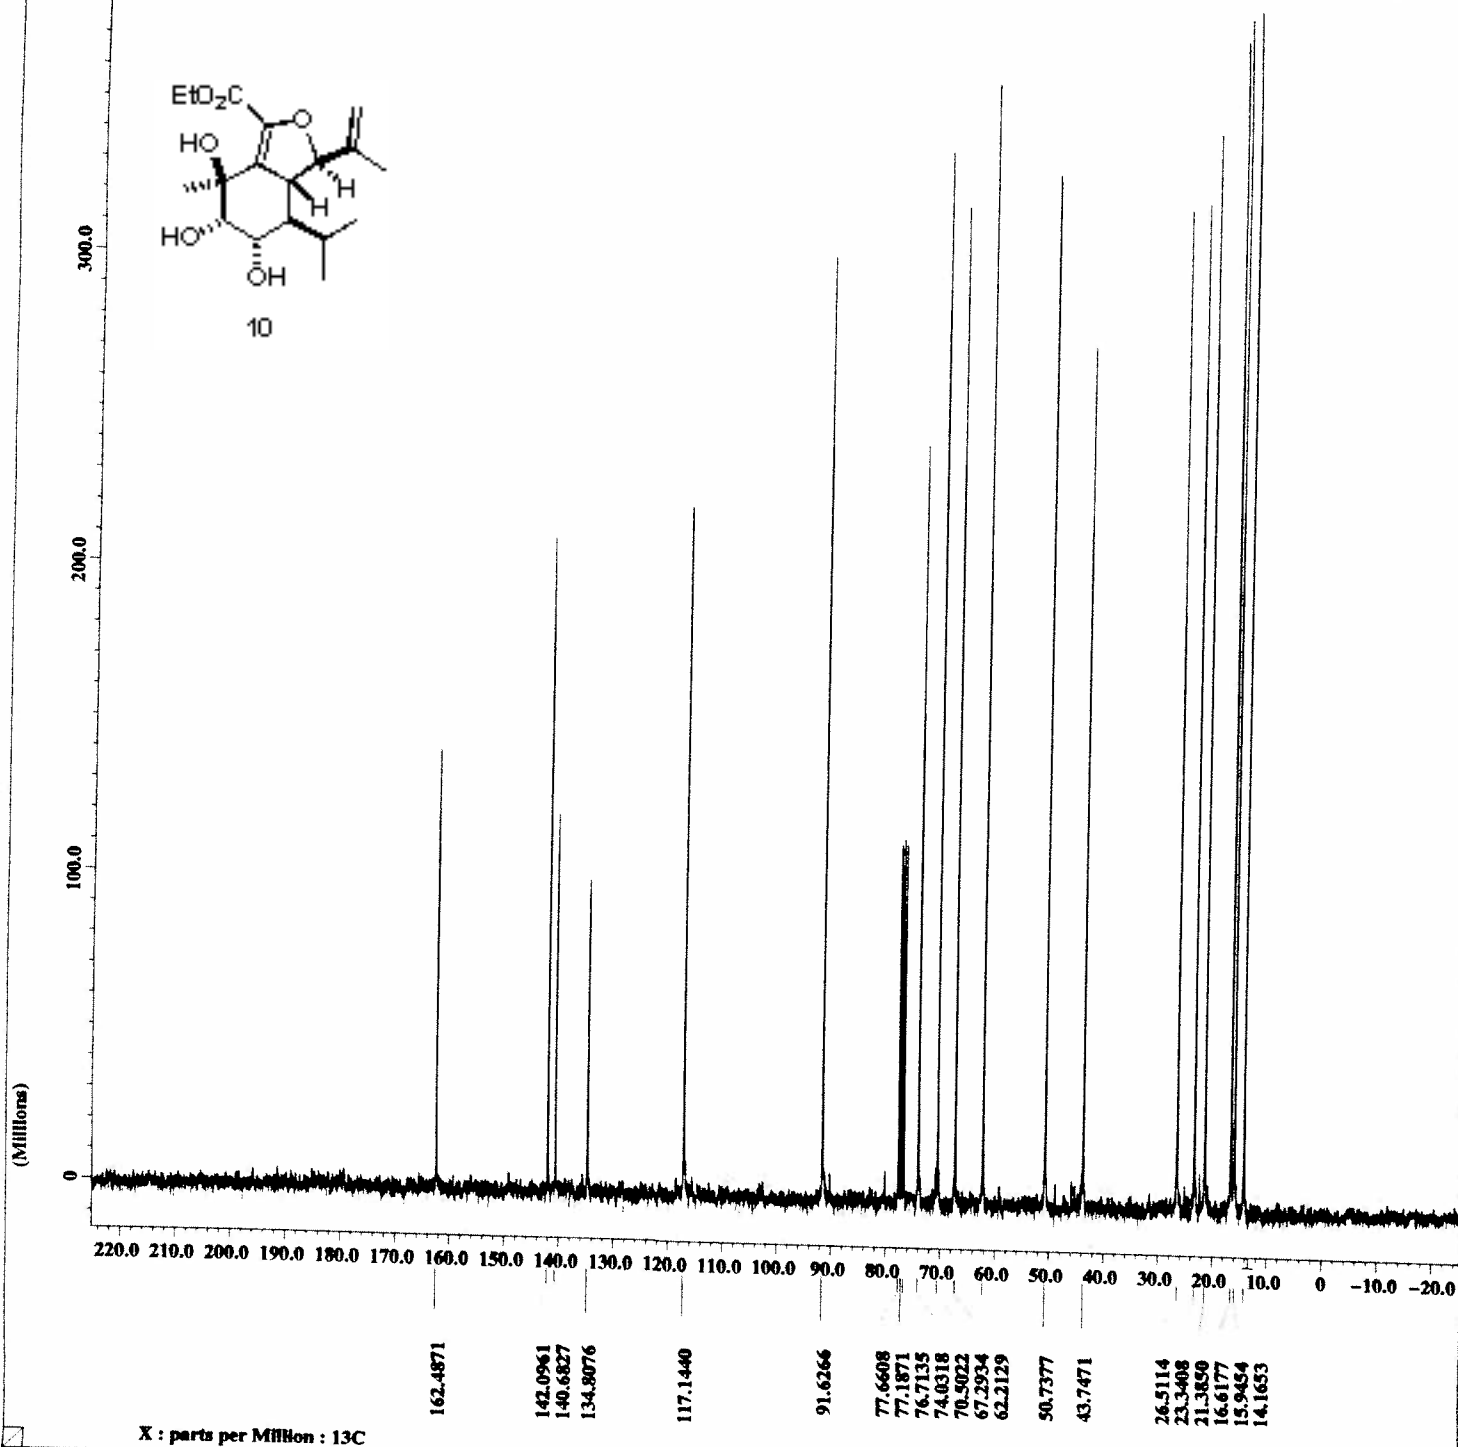

# JEOL

----- ACQUISITION PARAMETERS -----  
 Derived from: ychai-V-296-triol\_copy.1  
 File Name = ychai-V-296-triol\_cop  
 Author = mcintoshgroup  
 Sample ID = 88592067  
 Content = Single Pulse with Bro  
 Creation Date = 12-DEC-2004 17:25:32  
 Revision Date = 12-DEC-2004 16:40:35  
 Spec Site = Delta NMR  
 Spec Type = DELTA\_NMR  
 Data Format = 1D\_COMPLEX  
 Dimensions = X  
 Dim Title = 13C  
 Dim Size = 32768  
 Dim Units = [ppm]  
 Field\_strength = 6.345446[T] (270[MHz])  
 X\_acq\_duration = 1.9267584[s]  
 X\_domain = 13C  
 X\_freq = 67.93330993[MHz]  
 X\_offset = 100[ppm]  
 X\_points = 32768  
 X\_prescans = 4  
 X\_resolution = 0.51900643[Hz]  
 X\_sweep = 17.00680272[kHz]  
 Irr\_domain = 1H  
 Irr\_freq = 270.16608844[MHz]  
 Irr\_offset = 5[ppm]  
 Mod\_return = 1  
 Scans = 100  
 Total\_scans = 100  
 X\_90\_width = 8.3[us]  
 X\_acq\_time = 1.9267584[s]  
 X\_angle = 90[deg]  
 X\_pulse = 8.3[us]  
 Initial\_wait = 1[s]  
 Phase\_preset = 3[us]  
 Relaxation\_delay = 4[s]  
 Unblank\_time = 2[us]

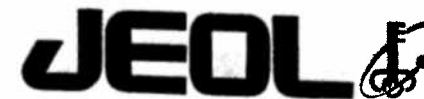

---- ACQUISITION PARAMETERS ----  
 Derived from: ychai-v-299-diacetate.1  
 File Name = ychai-v-299-diacetate  
 Author = mcintoshgroup  
 Sample ID = S0601520  
 Content = Single Pulse Experiment  
 Creation Date = 12-DEC-2004 17:32:16  
  
 Revision Date = 12-DEC-2004 16:55:53  
 Spec Site = Delta NMR  
  
 Spec Type = DELTA NMR  
 Data Format = 1D COMPLEX  
 Dimensions = X  
 Dim Title = 1H  
 Dim Size = 16384  
 Dim Units = [ppm]  
 Field\_strength = 6.345446[T] (270[MHz])  
 X\_acq\_duration = 5.0528256[s]  
 X\_domain = 1H  
 X\_freq = 270.16608844[MHz]  
 X\_offset = 5[ppm]  
 X\_points = 16384  
 X\_prescans = 0  
 X\_resolution = 0.19790907[Hz]  
 X\_sweep = 3.24254215[kHz]  
 Mod\_return = 1  
 Scans = 8  
 Total\_scans = 8  
  
 X\_90\_width = 10.4[us]  
 X\_acq\_time = 5.0528256[s]  
 X\_angle = 45[deg]  
 X\_pulse = 5.2[us]  
 Initial\_wait = 1[s]  
 Phase\_preset = 3[us]  
 Relaxation\_delay = 4[s]  
 Unblank\_time = 2[us]

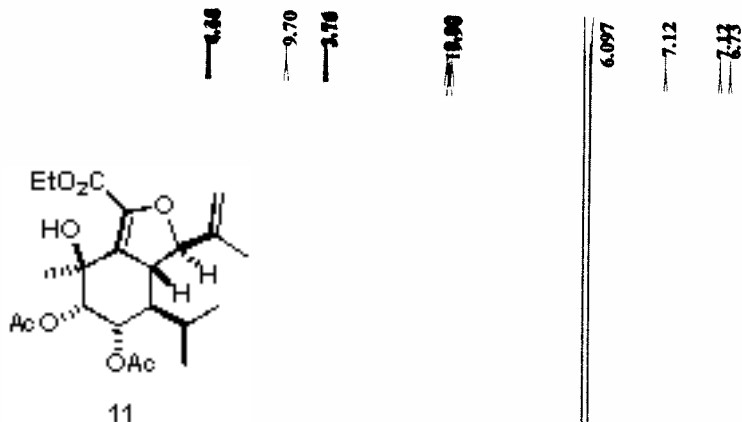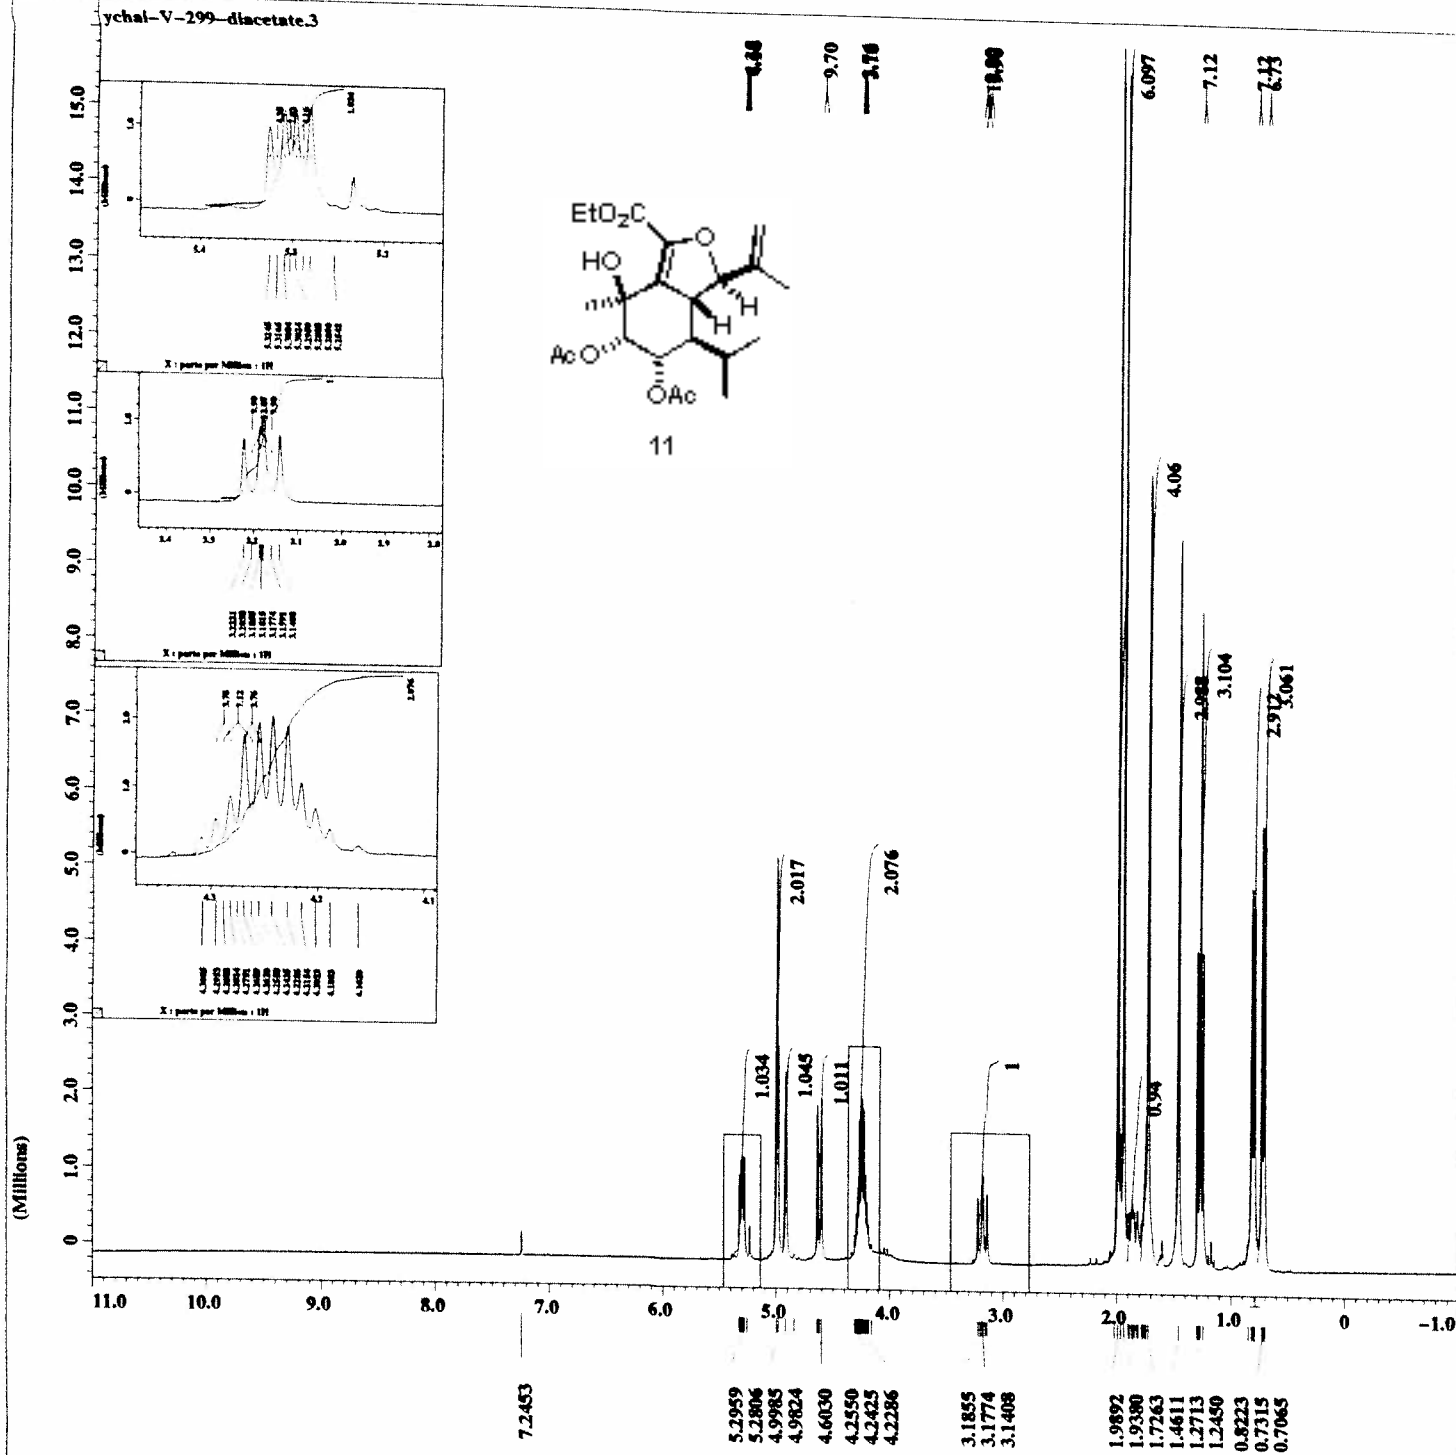

X : parts per Million : 1H

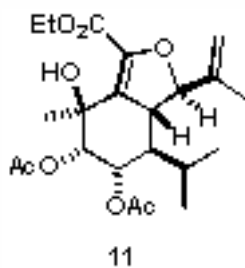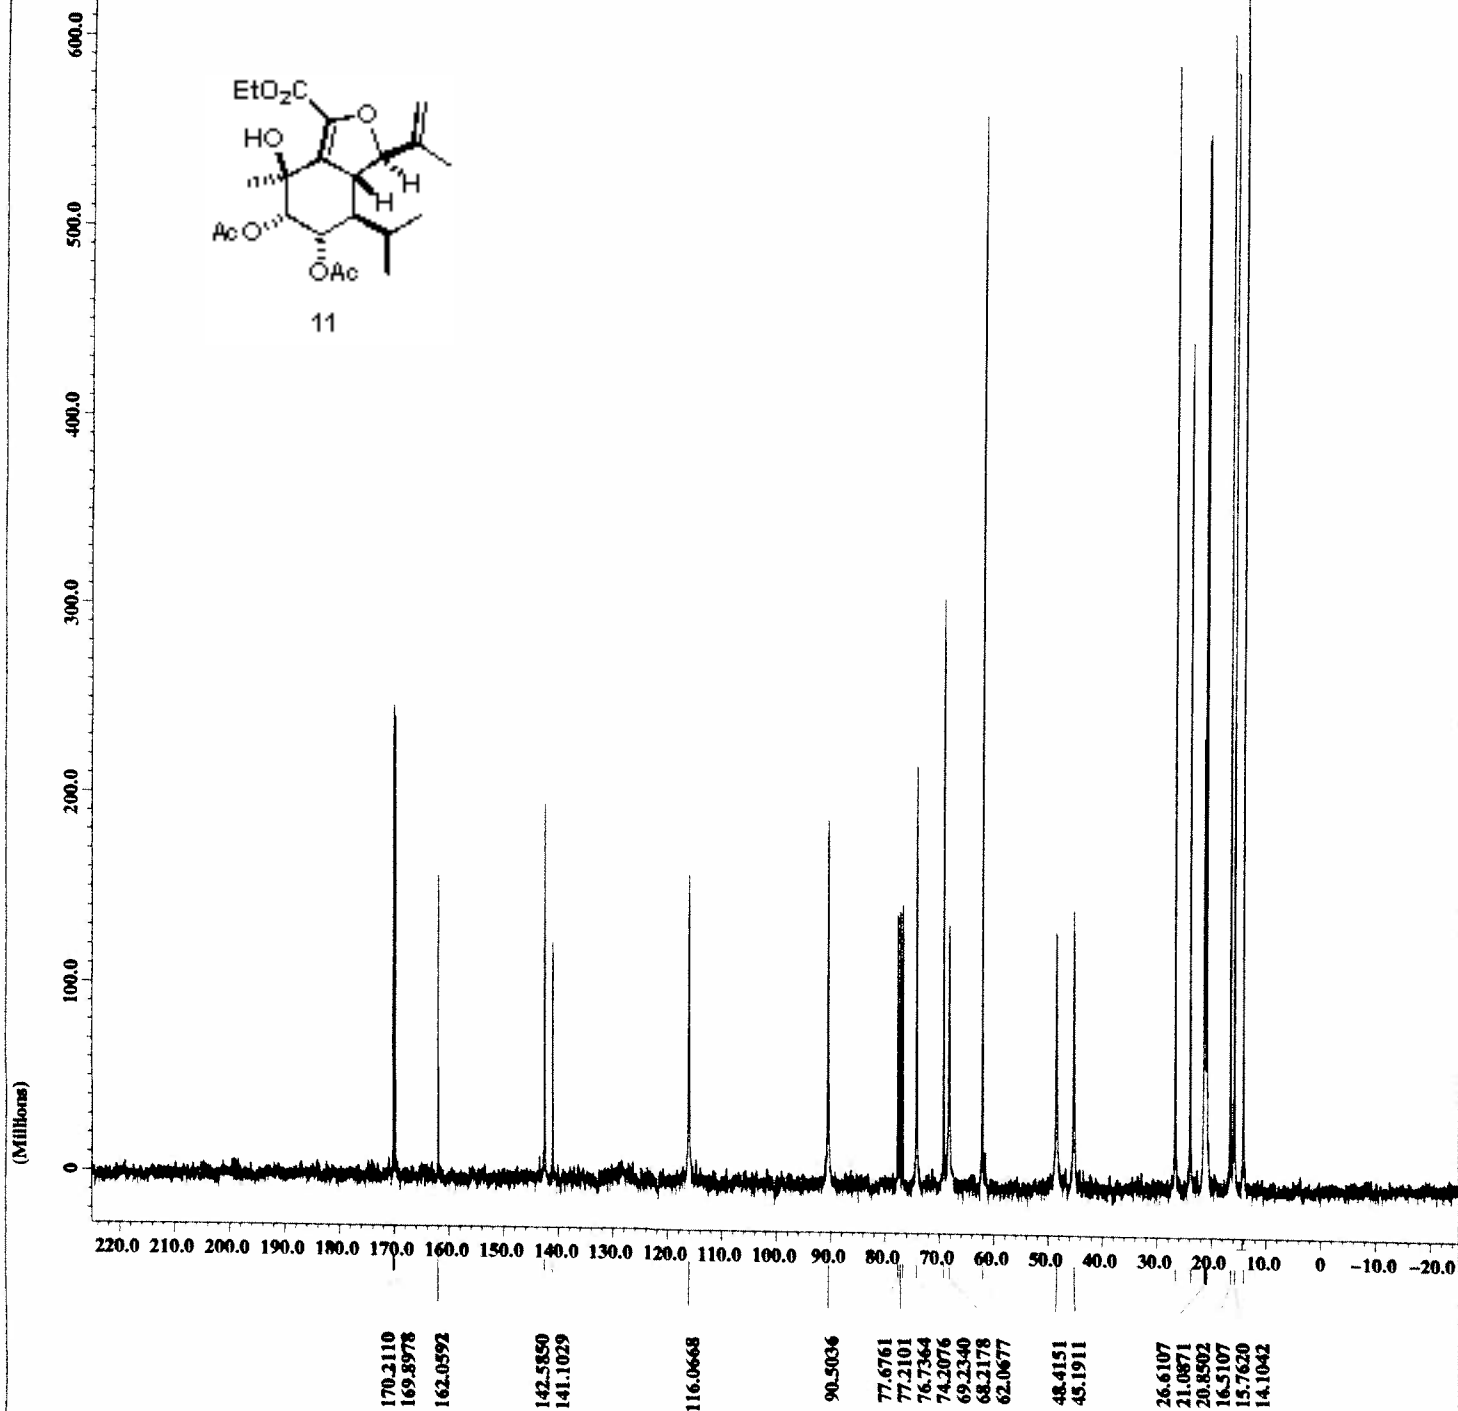

# JEOL

----- ACQUISITION PARAMETERS -----  
 Derived from: ychai-V-299-diacetate\_copy  
 File Name = ychai-V-299-diacetate\_copy  
 Author = mcintoshgroup  
 Sample ID = #0729127  
 Content = Single Pulse with Bro  
 Creation Date = 12-DEC-2004 21:29:49

Revision Date = 12-DEC-2004 20:43:32  
 Spec site = Delta NMR

Spec Type = DELTA\_NMR  
 Data Format = 1D\_COMPLEX  
 Dimensions = X  
 Dim Title = 13C  
 Dim Size = 32768  
 Dim Units = [ppm]  
 Field\_strength = 6.345446[T] (270[MHz])  
 X\_acq\_duration = 1.9267584[s]  
 X\_domain = 13C  
 X\_freq = 67.93330993[MHz]  
 X\_offset = 100[ppm]  
 X\_points = 32768  
 X\_prescans = 4  
 X\_resolution = 0.51900643[Hz]  
 X\_sweep = 17.00680272[kHz]  
 Irr\_domain = 1H  
 Irr\_freq = 270.16608844[MHz]  
 Irr\_offset = 5[ppm]  
 Mod\_return = 1  
 Scans = 272  
 Total\_scans = 272

X\_90\_width = 8.3[us]  
 X\_acq\_time = 1.9267584[s]  
 X\_angle = 135[deg]  
 X\_pulse = 12.45[us]  
 Initial\_wait = 1[s]  
 Phase\_preset = 3[us]  
 Relaxation\_delay = 4[s]  
 Unblank\_time = 2[us]

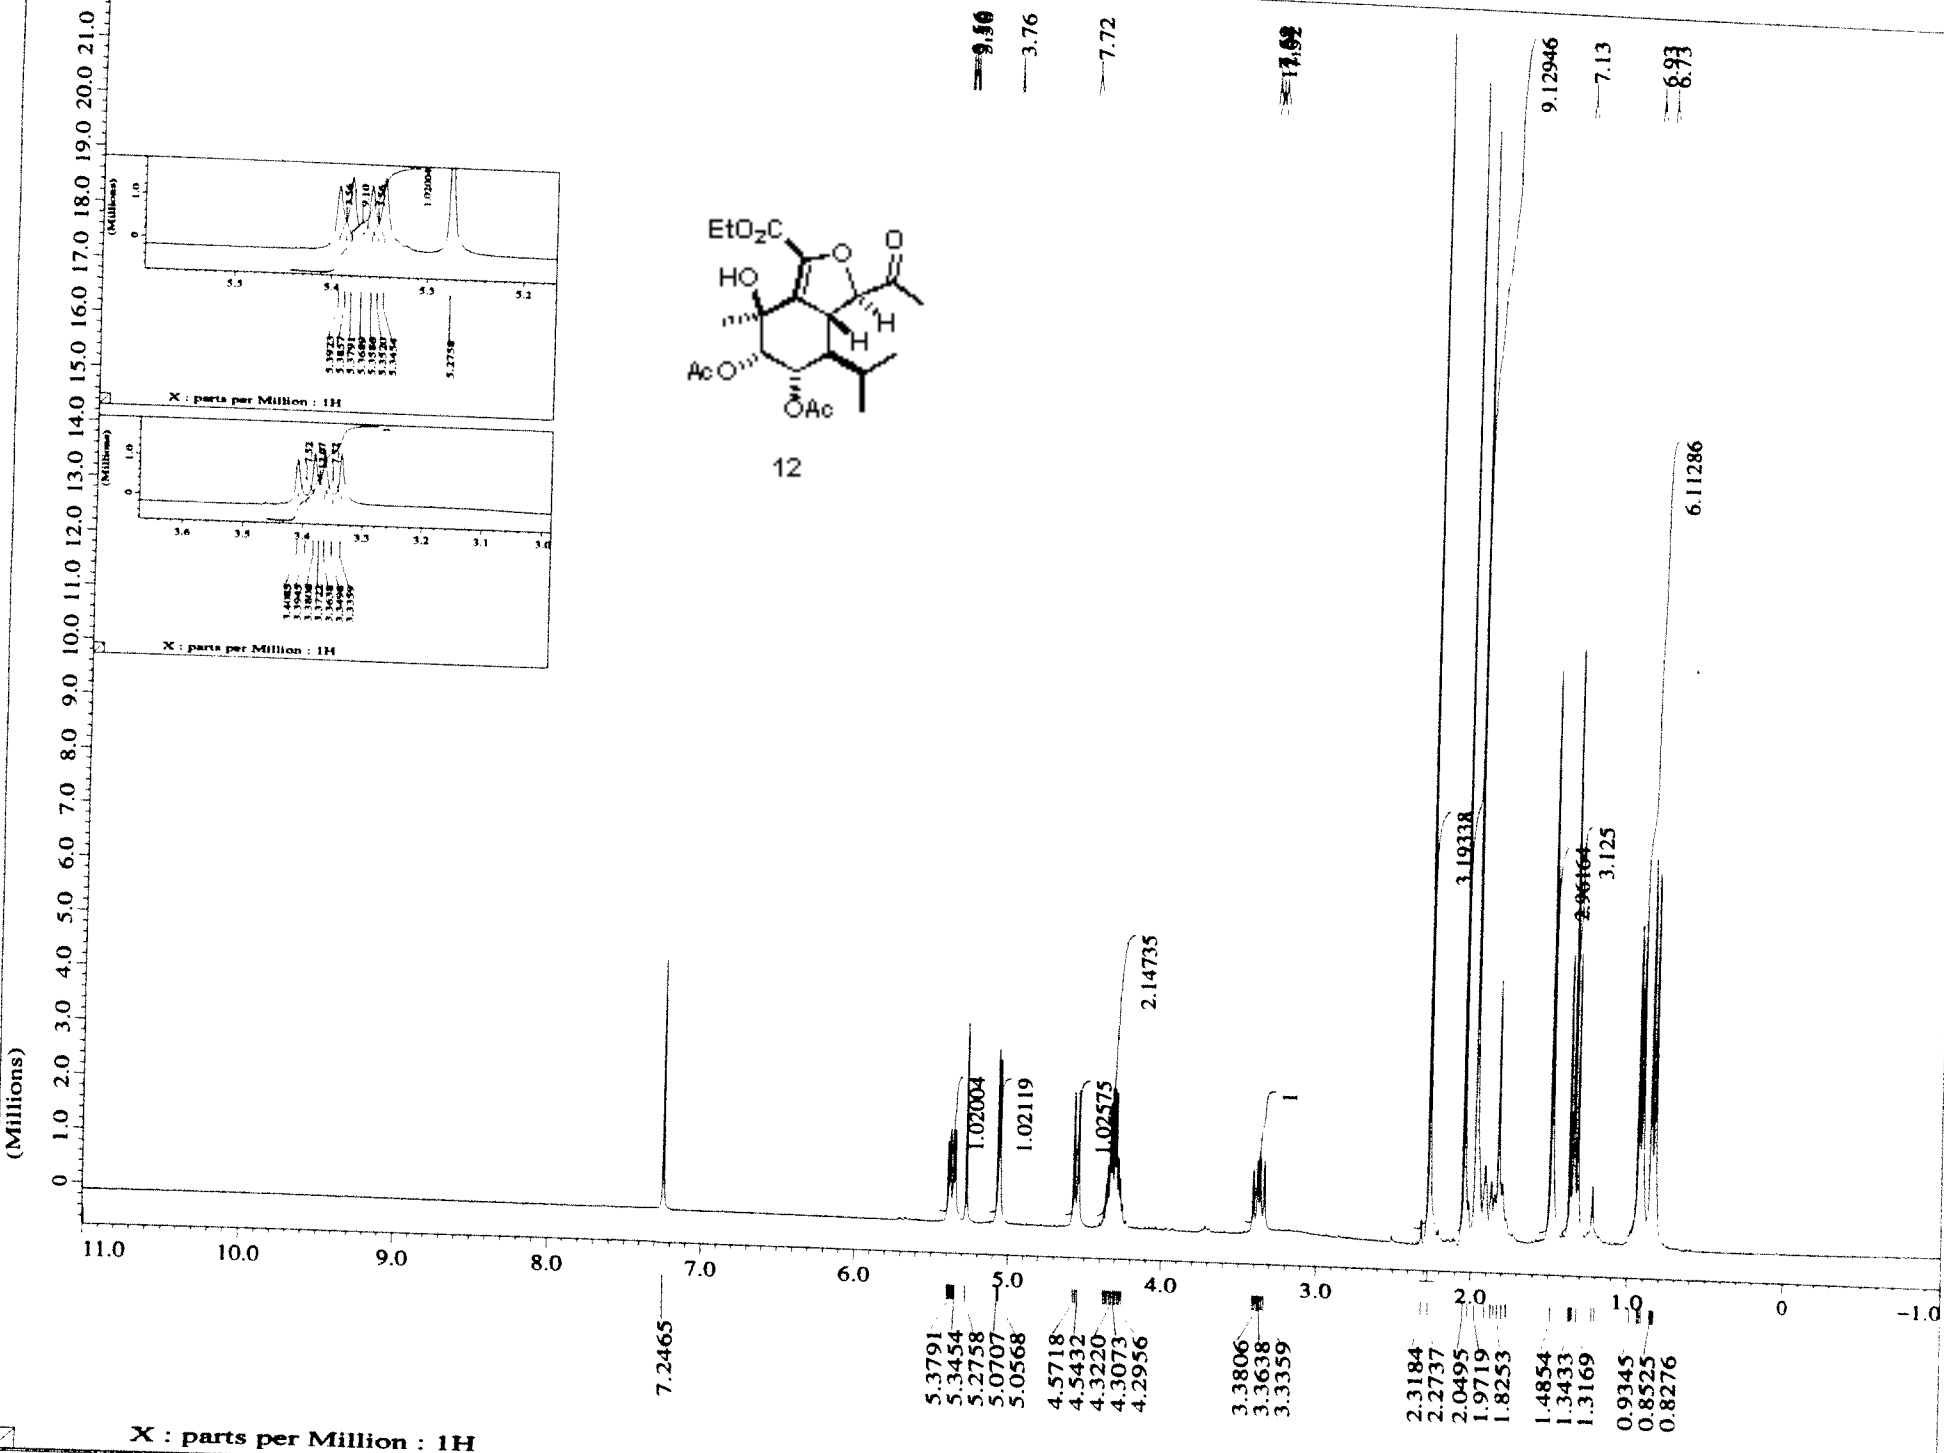

X : parts per Million : 1H

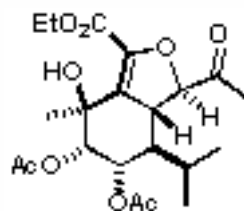

12

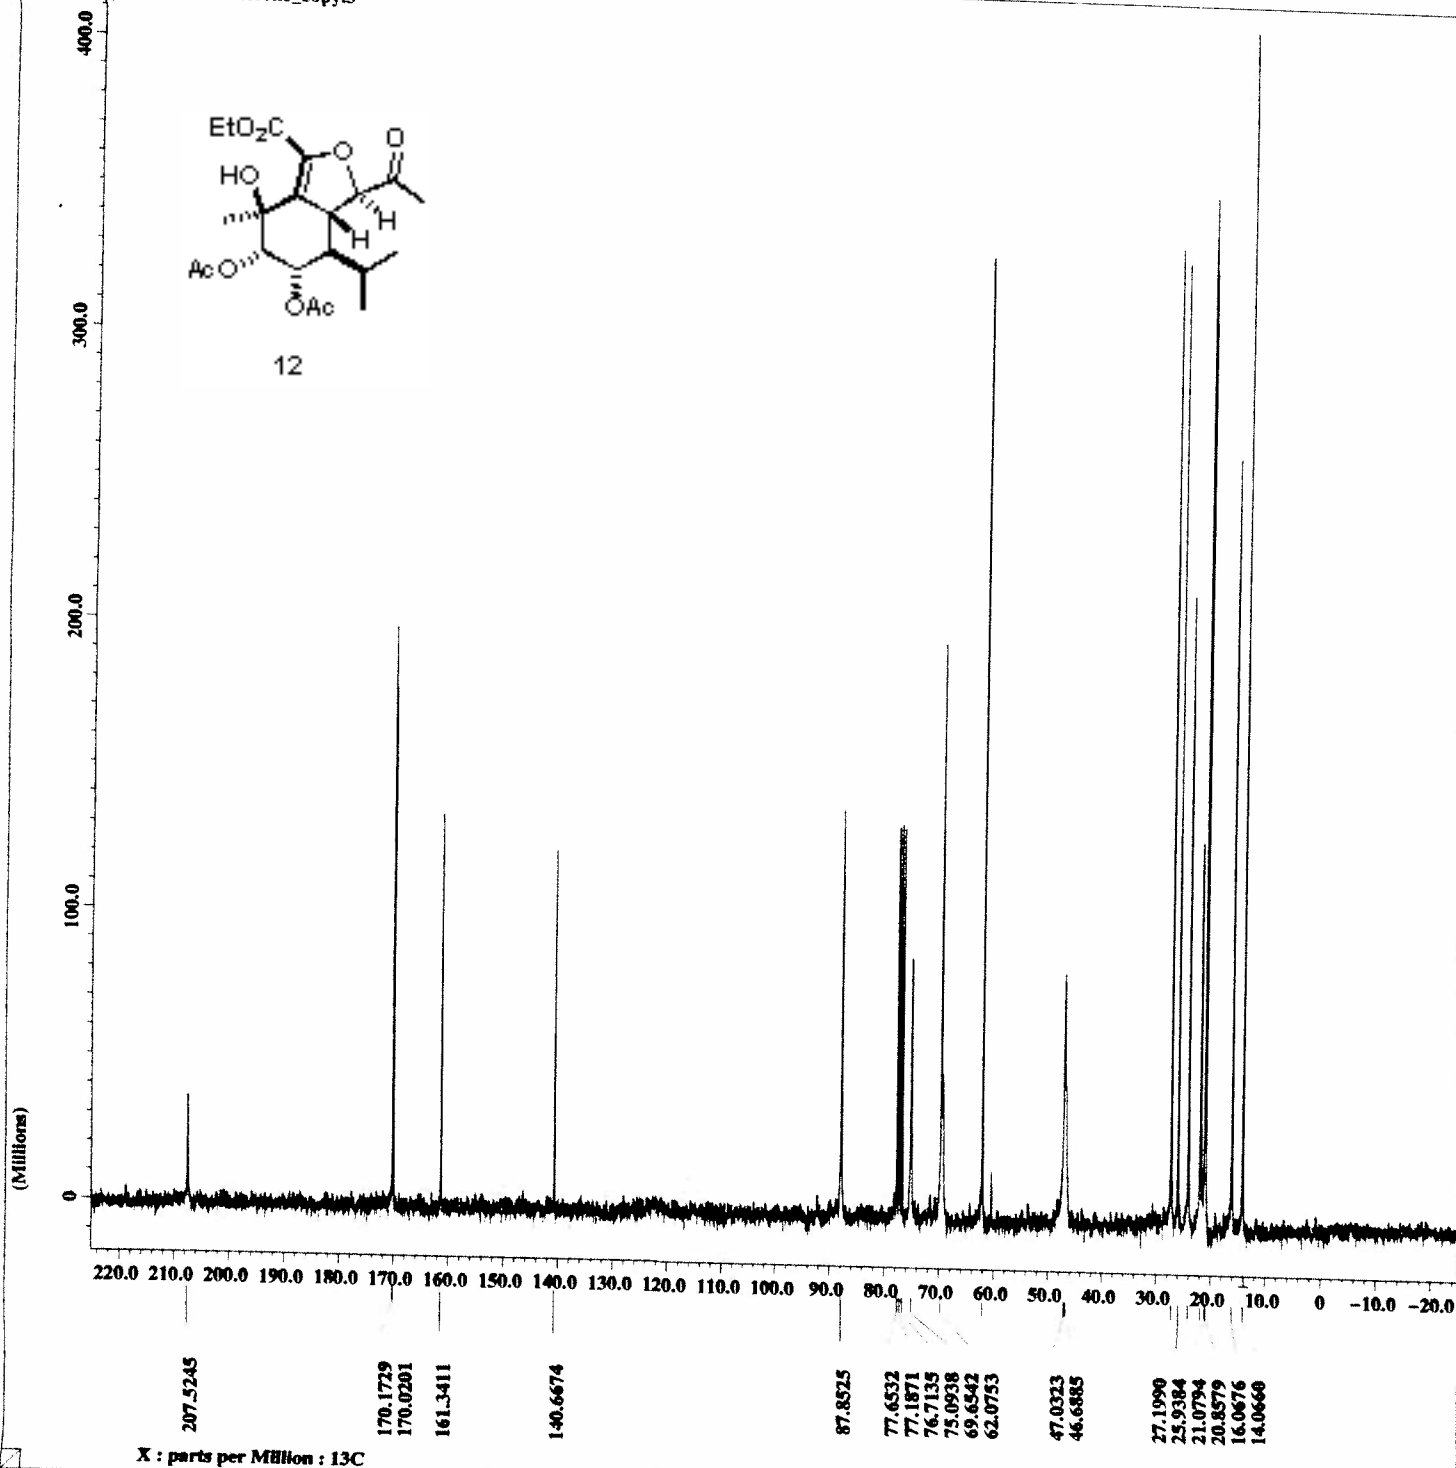

# JEOL

```

---- ACQUISITION PARAMETERS ----
Derived from: ychai-V-303-ketone_copy.1
File Name      = ychai-V-303-ketone_co
Author        = mcintoshgroup
Sample ID     = S8613300
Content       = Single Pulse with Bro
Creation Date  = 12-DEC-2004 18:04:42

Revision Date  = 12-DEC-2004 17:20:02
Spec Site     = Delta NMR

Spec Type      = DELTA_NMR
Data Format    = 1D_COMPLEX
Dimensions    = X
Dim Title     = 13C
Dim Size      = 32768
Dim Units     = [ppm]
Field_strength = 6.345446[T] (270[MHz])
X_acq_duration = 1.9267584[s]
X_domain      = 13C
X_freq        = 67.93330993[MHz]
X_offset      = 100[ppm]
X_points      = 32768
X_prescans    = 4
X_resolution  = 0.51906643[Hz]
X_sweep       = 17.00680272[kHz]
Irr_domain    = 1H
Irr_freq      = 270.14608844[MHz]
Irr_offset    = 5[ppm]
Mod_return    = 1
Scans         = 130
Total_scans   = 130

X_90_width    = 8.3[us]
X_acq_time    = 1.9267584[s]
X_angle       = 90[deg]
X_pulse       = 8.3[us]
Initial_wait  = 1[s]
Phase_preset  = 3[us]
Relaxation_delay = 4[s]
Unblank_time  = 2[us]
  
```

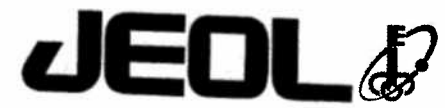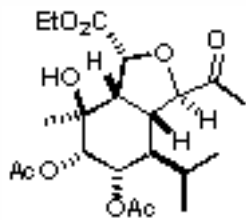

13

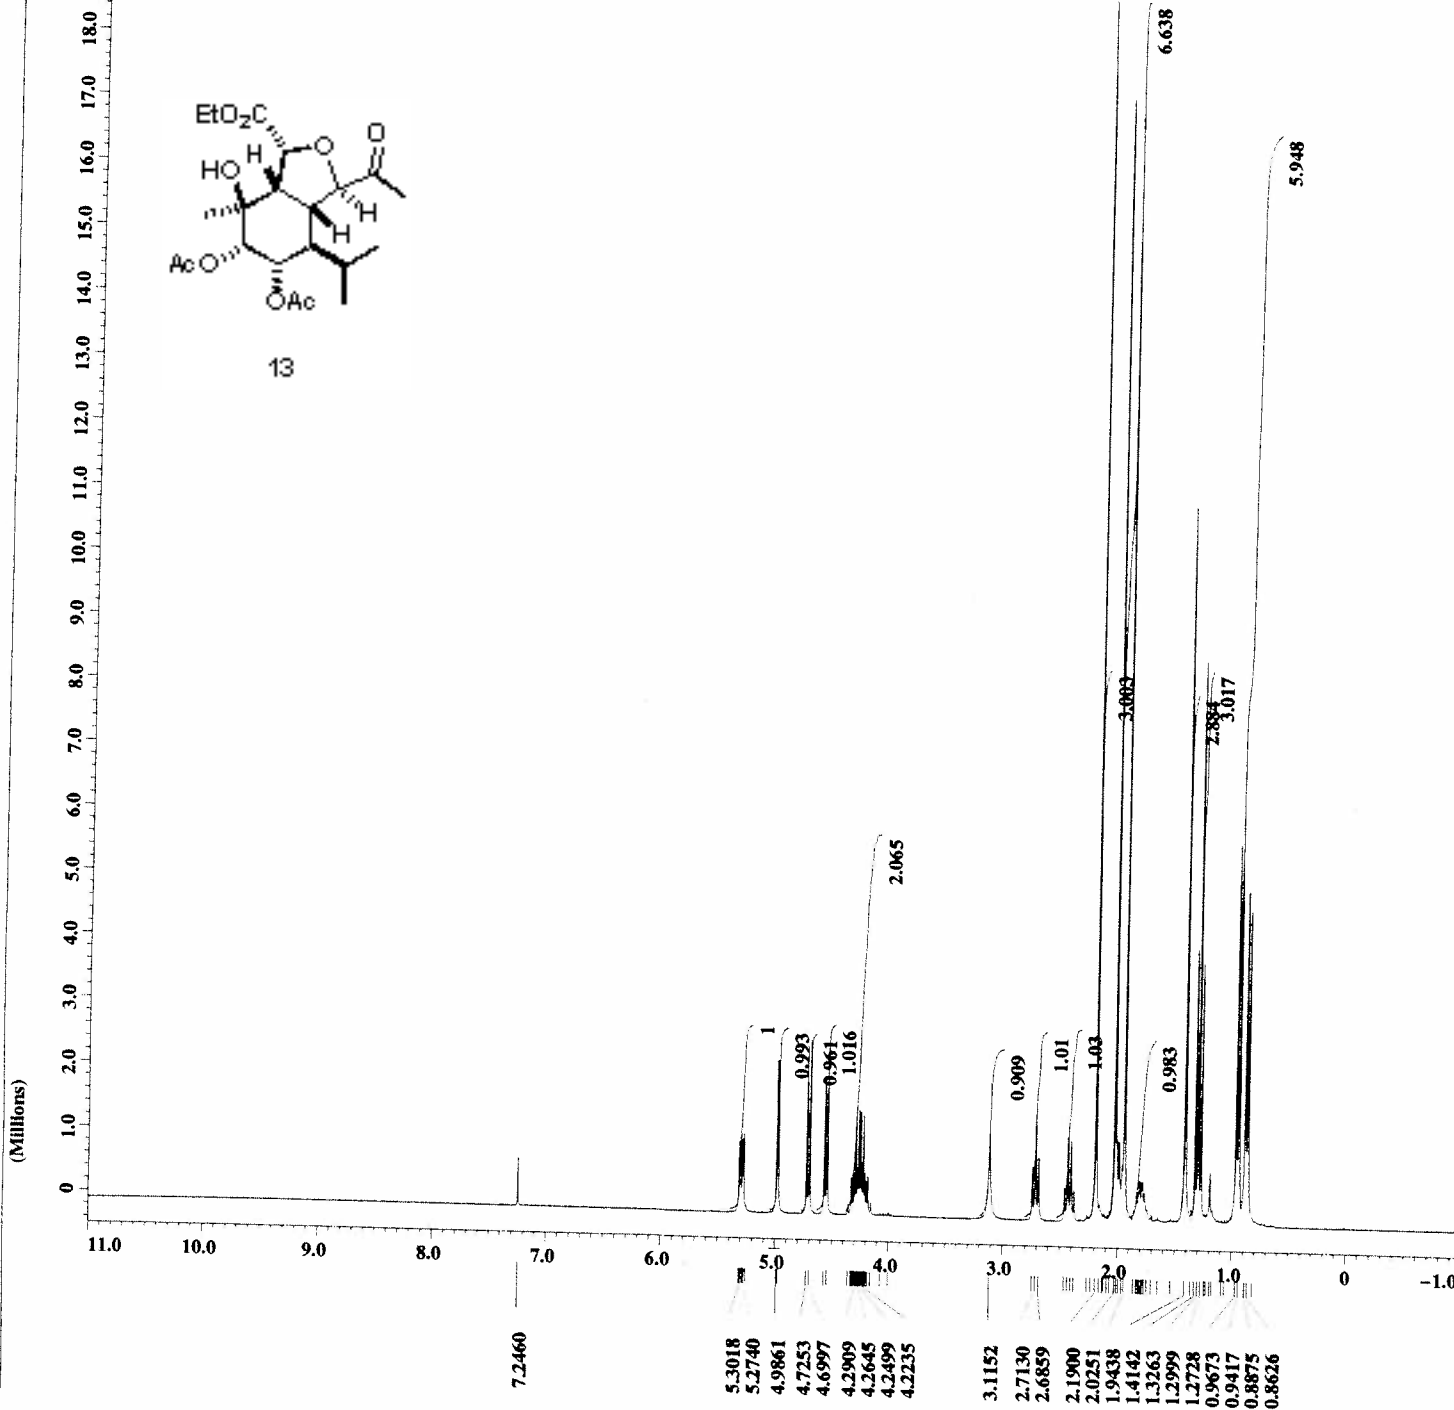

----- ACQUISITION PARAMETERS -----  
 Derived from: ychai-V-crabtree reduction  
 File Name = ychai-V-crabtree redu  
 Author = mcintoshgroup  
 Sample ID = S#471079  
 Content = single Pulse Experi  
 Creation Date = 14-OCT-2004 13:55:02  
  
 Revision Date = 14-OCT-2004 13:09:08  
 Spec Site = Delta NMR  
  
 Spec Type = DELTA\_NMR  
 Data Format = 1D\_COMPLEX  
 Dimensions = X  
 Dim Title = 1H  
 Dim Size = 16384  
 Dim Units = [ppm]  
 Field\_strength = 6.345446 [T] (270 [MHz])  
 X\_acq\_duration = 5.0528256 [s]  
 X\_domain = 1H  
 X\_freq = 270.16608844 [MHz]  
 X\_offset = 5 [ppm]  
 X\_points = 16384  
 X\_prescans = 0  
 X\_resolution = 0.19790907 [Hz]  
 X\_sweep = 3.24254215 [kHz]  
 Mod\_return = 1  
 Scans = 8  
 Total\_scans = 8  
  
 X\_90\_width = 10.4 [us]  
 X\_acq\_time = 5.0528256 [s]  
 X\_angle = 45 [deg]  
 X\_pulse = 5.2 [us]  
 Initial\_wait = 1 [s]  
 Phase\_preset = 3 [us]  
 Relaxation\_delay = 4 [s]  
 Unblank\_time = 2 [us]

ychai-VI-ketone-reduction.4

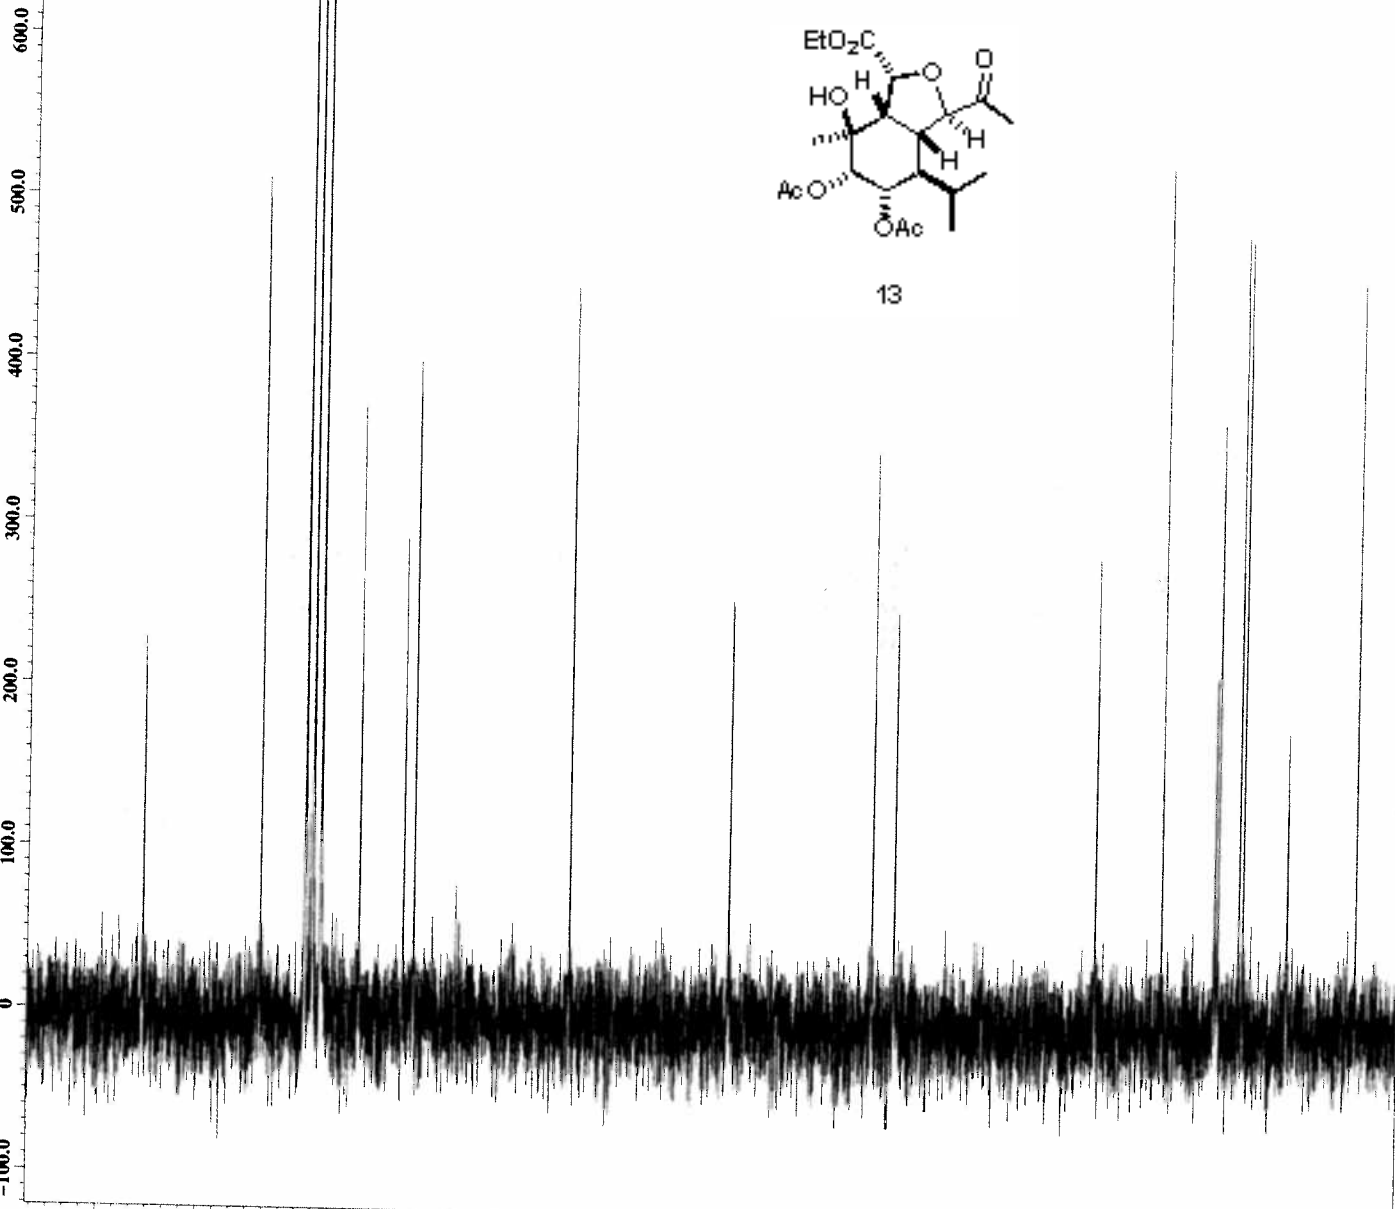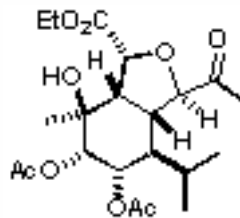

13

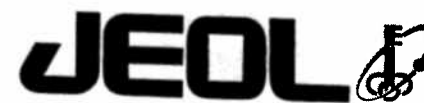

```

---- ACQUISITION PARAMETERS ----
Derived from: ychai-VI-ketone-reduction.
File Name      = ychai-VI-ketone-reduc
Author        = mcintoshgroup
Sample ID     = 8#778872
Content       = Single Pulse with Bro
Creation Date  = 28-JUL-2005 00:35:01

Revision Date  = 27-JUL-2005 23:46:40
Spec Site     = Delta NMR

Spec Type     = DELTA NMR
Data Format    = 1D COMPLEX
Dimensions    = X
Dim Title     = 13C
Dim Size      = 32768
Dim Units     = [ppm]
Field_strength = 6.345446 [T] (270 [MHz])
X_acq_duration = 1.9267584 [s]
X_domain      = 13C
X_freq        = 67.93330993 [MHz]
X_offset      = 100 [ppm]
X_points      = 32768
X_prescans    = 4
X_resolution  = 0.51900643 [Hz]
X_sweep       = 17.00680272 [kHz]
Irr_domain    = 1H
Irr_freq      = 270.16608844 [MHz]
Irr_offset    = 5 [ppm]
Mod_return    = 1
Scans         = 1383
Total_scans   = 1383

X_90_width    = 8.3 [us]
X_acq_time    = 1.9267584 [s]
X_angle       = 90 [deg]
X_pulse       = 8.3 [us]
Initial_wait  = 1 [s]
Phase_preset  = 3 [us]
Relaxation_delay = 3 [s]
Unblank_time  = 2 [us]
    
```

(Millions)

90.0 80.0 70.0 60.0 50.0 40.0 30.0 20.0

87.2948 80.2584 77.5615 77.0878 76.6218 74.2840 71.6558 71.0217 61.6246 51.9677 43.3346 41.9823 29.8959 25.8926 22.6991 22.5004 21.2475 20.9954 18.3902 14.2188

X : parts per Million : 13C
